# Supplementary material for: Dose escalation study of a personalized peptide-based neoantigen vaccine (EVX-01) in patients with metastatic melanoma
Source: PubMed Central journal article supplement — J Immunother Cancer. 2024 May 23;12(5):e008817. doi: 10.1136/jitc-2024-008817 (PMC11116868; doi:10.1136/jitc-2024-008817), 2024-05-23
Supplement: jitc-2024-008817supp004.pdf [file jitc-2024-008817supp004.pdf]

|       |                                                                                                                                                                                                                                                                          |                                                                                                                                                                                                                                                                                           |                                                                                                                                                                                                                                                                         |                                                                                                                                                                                                            |                                                                                                                                                                                                                                                       |                                                                                                                                                                         |
|-------|--------------------------------------------------------------------------------------------------------------------------------------------------------------------------------------------------------------------------------------------------------------------------|-------------------------------------------------------------------------------------------------------------------------------------------------------------------------------------------------------------------------------------------------------------------------------------------|-------------------------------------------------------------------------------------------------------------------------------------------------------------------------------------------------------------------------------------------------------------------------|------------------------------------------------------------------------------------------------------------------------------------------------------------------------------------------------------------|-------------------------------------------------------------------------------------------------------------------------------------------------------------------------------------------------------------------------------------------------------|-------------------------------------------------------------------------------------------------------------------------------------------------------------------------|
| PT 01 | <p><b>Peptide 01</b><br/>C64H2<br/>S2747F</p> <p>DKLGVVDFLEFSSGIEFKKLASKT<br/>DKLGVDFIYFFFGPRFKTLASKT<br/>-----GPRFKLASKY<br/>-----LGFVDIIEF-----<br/>-----GPFKFKTL-----<br/>-----GPFKFKTL-----<br/>-----GPFKFKTL-----<br/>-----GPFKFKTL-----<br/>-----GPFKFKTL-----</p> | <p><b>Peptide 02</b><br/>SLC25A8<br/>P107L</p> <p>DCVKTMSGLQFQAARIKVVLEALNR<br/>DCVKTMSGLQFQAARIKVVLEALNR<br/>-----SQQRGLAARY-----<br/>-----RYNNVLEALN-----<br/>-----LAARYRNVL-----<br/>-----AARYNVYV-----<br/>-----RYNNVLEALN-----<br/>-----RYNNVLEALN-----<br/>-----RYNNVLEALN-----</p> | <p><b>Peptide 03</b><br/>SNAP47<br/>H591Y</p> <p>HRFRREVDVLIKVRSEYLLSLGRFVIG<br/>HRFRREVDVLIKVRSEYLLSLGRFVIG<br/>-----DQDQKVVYSRY-----<br/>-----VYESTIQGRF-----<br/>-----VYESTIQGRF-----<br/>-----VYESTIQGRF-----<br/>-----VYESTIQGRF-----<br/>-----VYESTIQGRF-----</p> | <p><b>Peptide 04</b><br/>BTCLM2<br/>G31A</p> <p>LLAGRAVRAASGLDMNTVVLSEVQD<br/>LLAGRAVRAASGLDMNTVVLSEVQD<br/>-----ALFRNTVTV-----<br/>-----SALPNTVV-----<br/>-----KPRRAGSAL-----<br/>-----KPRRAGSAL-----</p> | <p><b>Peptide 05</b><br/>VPS13A<br/>V97H</p> <p>TVNAKLVVPLKSTVNNVQLIKVNS<br/>TVNAKLVVPLKSTVNNVQLIKVNS<br/>-----MYFLGLACTY-----<br/>-----IYNNVQLQ-----<br/>-----IYNNVQLQ-----<br/>-----IYNNVQLQ-----<br/>-----IYNNVQLQ-----<br/>-----IYNNVQLQ-----</p> | <p>HLA</p> <ul style="list-style-type: none"> <li>A A0101</li> <li>A A2402</li> <li>B B0702</li> <li>B B0801</li> <li>C C0701</li> <li>C C0702</li> <li>a NA</li> </ul> |
|       | <p><b>Peptide 06</b><br/>ABCAB<br/>P446B</p> <p>QIFLLDEPTAGLDFPDRHVVLLKKA<br/>QIFLLDEPTAGLDFPDRHVVLLKKA<br/>-----LDEPTAGL-----<br/>-----LDEPTAGL-----<br/>-----LDEPTAGL-----<br/>-----LDEPTAGL-----<br/>-----LDEPTAGL-----</p>                                           | <p><b>Peptide 07</b><br/>DCC1<br/>P133B</p> <p>SNAMFVSEVALMSFPFKSLPFAELFO<br/>SNAMFVSEVALMSFPFKSLPFAELFO<br/>-----AMSPFPKSL-----<br/>-----AMSPFPKSL-----<br/>-----AMSPFPKSL-----<br/>-----AMSPFPKSL-----<br/>-----AMSPFPKSL-----</p>                                                      | <p><b>Peptide 08</b><br/>RBAK<br/>P130V</p> <p>FOKLELTCMLNLSSEKFKYECSECK<br/>FOKLELTCMLNLSSEKFKYECSECK<br/>-----RKYGKFRY-----<br/>-----RKYGKFRY-----<br/>-----RKYGKFRY-----<br/>-----RKYGKFRY-----<br/>-----RKYGKFRY-----</p>                                           | <p><b>Peptide 09</b><br/>MAP4<br/>D30N</p> <p>NOFSEHSEALVQKMLPTEERVALVK<br/>NOFSEHSEALVQKMLPTEERVALVK<br/>-----SCLVVALV-----<br/>-----SCLVVALV-----<br/>-----SCLVVALV-----<br/>-----SCLVVALV-----</p>      | <p><b>Peptide 10</b><br/>CRCP<br/>T11H</p> <p>ELITEEQEALLVTVSTLPAEPAEQ<br/>ELITEEQEALLVTVSTLPAEPAEQ<br/>-----SLEEQEALL-----<br/>-----SLEEQEALL-----<br/>-----SLEEQEALL-----<br/>-----SLEEQEALL-----</p>                                               | <p>HLA</p> <ul style="list-style-type: none"> <li>A A0201</li> <li>A A2402</li> <li>B B1501</li> <li>C C0401</li> <li>a NA</li> </ul>                                   |
| PT 02 | <p><b>Peptide 01</b><br/>IFR180<br/>Q510H</p> <p>EIAVAAGIIEIKVYIHSKMLPKESK<br/>EIAVAAGIIEIKVYIHSKMLPKESK<br/>-----AAIGIIEIKV-----<br/>-----AIGIIEIKV-----<br/>-----AIGIIEIKV-----<br/>-----AIGIIEIKV-----<br/>-----AIGIIEIKV-----</p>                                    | <p><b>Peptide 02</b><br/>GPR180<br/>H43K</p> <p>EYVSESVTLPLTSSSKKSRPWF<br/>EYVSESVTLPLTSSSKKSRPWF<br/>-----SSSVTLPL-----<br/>-----SSSVTLPL-----<br/>-----SSSVTLPL-----<br/>-----SSSVTLPL-----<br/>-----SSSVTLPL-----</p>                                                                  | <p><b>Peptide 03</b><br/>HMGB4<br/>S98L</p> <p>DKMSDDVYVGGIIELESCKKFKKES<br/>DKMSDDVYVGGIIELESCKKFKKES<br/>-----FFGDLSG-----<br/>-----FFGDLSG-----<br/>-----FFGDLSG-----<br/>-----FFGDLSG-----<br/>-----FFGDLSG-----</p>                                                | <p><b>Peptide 04</b><br/>RBM3<br/>M33P</p> <p>TYDRPMSQDPAIISGPPCOONHLELG<br/>TYDRPMSQDPAIISGPPCOONHLELG<br/>-----THLPPHN-----<br/>-----THLPPHN-----<br/>-----THLPPHN-----<br/>-----THLPPHN-----</p>        | <p><b>Peptide 05</b><br/>DDX10<br/>S57F</p> <p>EVEKFRVAFVFAKSLQKGGKLEQTE<br/>EVEKFRVAFVFAKSLQKGGKLEQTE<br/>-----RAVYKMSK-----<br/>-----RAVYKMSK-----<br/>-----RAVYKMSK-----<br/>-----RAVYKMSK-----</p>                                                | <p>HLA</p> <ul style="list-style-type: none"> <li>A A0201</li> <li>A A2402</li> <li>B B1501</li> <li>C C0401</li> <li>a NA</li> </ul>                                   |
|       | <p><b>Peptide 06</b><br/>ABCAB<br/>P446B</p> <p>QIFLLDEPTAGLDFPDRHVVLLKKA<br/>QIFLLDEPTAGLDFPDRHVVLLKKA<br/>-----LDEPTAGL-----<br/>-----LDEPTAGL-----<br/>-----LDEPTAGL-----<br/>-----LDEPTAGL-----<br/>-----LDEPTAGL-----</p>                                           | <p><b>Peptide 07</b><br/>DCC1<br/>P133B</p> <p>SNAMFVSEVALMSFPFKSLPFAELFO<br/>SNAMFVSEVALMSFPFKSLPFAELFO<br/>-----AMSPFPKSL-----<br/>-----AMSPFPKSL-----<br/>-----AMSPFPKSL-----<br/>-----AMSPFPKSL-----<br/>-----AMSPFPKSL-----</p>                                                      | <p><b>Peptide 08</b><br/>RBAK<br/>P130V</p> <p>FOKLELTCMLNLSSEKFKYECSECK<br/>FOKLELTCMLNLSSEKFKYECSECK<br/>-----RKYGKFRY-----<br/>-----RKYGKFRY-----<br/>-----RKYGKFRY-----<br/>-----RKYGKFRY-----</p>                                                                  | <p><b>Peptide 09</b><br/>MAP4<br/>D30N</p> <p>NOFSEHSEALVQKMLPTEERVALVK<br/>NOFSEHSEALVQKMLPTEERVALVK<br/>-----SCLVVALV-----<br/>-----SCLVVALV-----<br/>-----SCLVVALV-----<br/>-----SCLVVALV-----</p>      | <p><b>Peptide 10</b><br/>CRCP<br/>T11H</p> <p>ELITEEQEALLVTVSTLPAEPAEQ<br/>ELITEEQEALLVTVSTLPAEPAEQ<br/>-----SLEEQEALL-----<br/>-----SLEEQEALL-----<br/>-----SLEEQEALL-----<br/>-----SLEEQEALL-----</p>                                               | <p>HLA</p> <ul style="list-style-type: none"> <li>A A1101</li> <li>B B3501</li> <li>C C0401</li> <li>a NA</li> </ul>                                                    |
| PT 03 | <p><b>Peptide 01</b><br/>FLM8<br/>E1128K</p> <p>DVITPCSPFRATDMPDPRKVVASCP<br/>DVIITPCSPFRATDMPDPRKVVASCP<br/>-----SFFKADZKMF-----<br/>-----SFFKADZKMF-----<br/>-----SFFKADZKMF-----<br/>-----SFFKADZKMF-----<br/>-----SFFKADZKMF-----</p>                                | <p><b>Peptide 02</b><br/>CLL8<br/>G2433D</p> <p>IATIQSAGQPRVQLGQSVKPAKPC<br/>IATIQSAGQPRVQLGQSVKPAKPC<br/>-----SDFVKAQAAL-----<br/>-----SDFVKAQAAL-----<br/>-----SDFVKAQAAL-----<br/>-----SDFVKAQAAL-----<br/>-----SDFVKAQAAL-----</p>                                                    | <p><b>Peptide 03</b><br/>ACTP01<br/>D36N</p> <p>AQLKTNAPSSQGTAVVTVSTLHTA<br/>AQLKTNAPSSQGTAVVTVSTLHTA<br/>-----SMLAZVYKAS-----<br/>-----SMLAZVYKAS-----<br/>-----SMLAZVYKAS-----<br/>-----SMLAZVYKAS-----</p>                                                           | <p><b>Peptide 04</b><br/>LPT1<br/>F56L</p> <p>AKSRPAIDSPVSLIINQTNRMDEM<br/>AKSRPAIDSPVSLIINQTNRMDEM<br/>-----ALDQVGL-----<br/>-----ALDQVGL-----<br/>-----ALDQVGL-----<br/>-----ALDQVGL-----</p>            | <p><b>Peptide 05</b><br/>A1P10<br/>P55S</p> <p>QIFKSGRIRIVTVHITQPFQDEYKFS<br/>QIFKSGRIRIVTVHITQPFQDEYKFS<br/>-----SIVSGLQKPF-----<br/>-----SIVSGLQKPF-----<br/>-----SIVSGLQKPF-----<br/>-----SIVSGLQKPF-----</p>                                      | <p>HLA</p> <ul style="list-style-type: none"> <li>A A1101</li> <li>B B3501</li> <li>C C0401</li> <li>a NA</li> </ul>                                                    |
|       | <p><b>Peptide 06</b><br/>COL2A1<br/>R271Q</p> <p>LQKRNAGASQSVYVMGSPVVGSTEV<br/>LQKRNAGASQSVYVMGSPVVGSTEV<br/>-----SGLVLSQK-----<br/>-----SGLVLSQK-----<br/>-----SGLVLSQK-----<br/>-----SGLVLSQK-----</p>                                                                 | <p><b>Peptide 07</b><br/>LIG3<br/>P535S</p> <p>NPSVFRSLKPVLPKRVAFKDYTPQA<br/>NPSVFRSLKPVLPKRVAFKDYTPQA<br/>-----SGLVLSQK-----<br/>-----SGLVLSQK-----<br/>-----SGLVLSQK-----<br/>-----SGLVLSQK-----</p>                                                                                    | <p><b>Peptide 08</b><br/>PEAK1<br/>P1633S</p> <p>YTRADLPTPTPSPYSGTQQAGCLL<br/>YTRADLPTPTPSPYSGTQQAGCLL<br/>-----RKLALVLS-----<br/>-----RKLALVLS-----<br/>-----RKLALVLS-----<br/>-----RKLALVLS-----</p>                                                                  | <p><b>Peptide 09</b><br/>E203<br/>C73S</p> <p>LAMEYTRVYVNLCSRPFRVLCALIA<br/>LAMEYTRVYVNLCSRPFRVLCALIA<br/>-----AMEYTRVNL-----<br/>-----AMEYTRVNL-----<br/>-----AMEYTRVNL-----<br/>-----AMEYTRVNL-----</p>  | <p><b>Peptide 10</b><br/>ZNF451<br/>H397P</p> <p>QYCKKQKGAASVYSSPFRSKLHNSK<br/>QYCKKQKGAASVYSSPFRSKLHNSK<br/>-----SDFSSFSN-----<br/>-----SDFSSFSN-----<br/>-----SDFSSFSN-----<br/>-----SDFSSFSN-----</p>                                              | <p>HLA</p> <ul style="list-style-type: none"> <li>A A0201</li> <li>B B1801</li> <li>C C0701</li> <li>a NA</li> </ul>                                                    |
| PT 04 | <p><b>Peptide 01</b><br/>HTT<br/>P2579S</p> <p>SHIATHELVQANDVIVSLPATTGALL<br/>SHIATHELVQANDVIVSLPATTGALL<br/>-----SHIATHELV-----<br/>-----SHIATHELV-----<br/>-----SHIATHELV-----<br/>-----SHIATHELV-----</p>                                                             | <p><b>Peptide 02</b><br/>VPS13D<br/>S2068F</p> <p>XNKLEAREPQVTSLOKRESVYASNT<br/>XNKLEAREPQVTSLOKRESVYASNT<br/>-----LQAGPQTE-----<br/>-----LQAGPQTE-----<br/>-----LQAGPQTE-----<br/>-----LQAGPQTE-----</p>                                                                                 | <p><b>Peptide 03</b><br/>TMEH12A<br/>P64L</p> <p>LDPAEDQAGLVVLIQVSHLSS<br/>LDPAEDQAGLVVLIQVSHLSS<br/>-----VGLQVSHLSS-----<br/>-----VGLQVSHLSS-----<br/>-----VGLQVSHLSS-----<br/>-----VGLQVSHLSS-----</p>                                                                | <p><b>Peptide 04</b><br/>E203<br/>C73S</p> <p>LAMEYTRVYVNLCSRPFRVLCALIA<br/>LAMEYTRVYVNLCSRPFRVLCALIA<br/>-----AMEYTRVNL-----<br/>-----AMEYTRVNL-----<br/>-----AMEYTRVNL-----<br/>-----AMEYTRVNL-----</p>  | <p><b>Peptide 05</b><br/>ZNF451<br/>H397P</p> <p>QYCKKQKGAASVYSSPFRSKLHNSK<br/>QYCKKQKGAASVYSSPFRSKLHNSK<br/>-----SDFSSFSN-----<br/>-----SDFSSFSN-----<br/>-----SDFSSFSN-----<br/>-----SDFSSFSN-----</p>                                              | <p>HLA</p> <ul style="list-style-type: none"> <li>A A0201</li> <li>B B1801</li> <li>C C0701</li> <li>a NA</li> </ul>                                                    |
|       | <p><b>Peptide 06</b><br/>R09H<br/>L783P</p> <p>VSEVQQLQKRIITLQDLENGPQLA<br/>VSEVQQLQKRIITLQDLENGPQLA<br/>-----LQAGPQTE-----<br/>-----LQAGPQTE-----<br/>-----LQAGPQTE-----<br/>-----LQAGPQTE-----</p>                                                                     | <p><b>Peptide 07</b><br/>TCN1<br/>K233K</p> <p>YIKLVEKLEKREKMLGNTPTSTGE<br/>YIKLVEKLEKREKMLGNTPTSTGE<br/>-----ANSGLIGNTF-----<br/>-----ANSGLIGNTF-----<br/>-----ANSGLIGNTF-----<br/>-----ANSGLIGNTF-----</p>                                                                              | <p><b>Peptide 08</b><br/>FAM8<br/>E91K</p> <p>RDVDELEFINSTLFPVNSAAKKA<br/>RDVDELEFINSTLFPVNSAAKKA<br/>-----PILSFPVNS-----<br/>-----PILSFPVNS-----<br/>-----PILSFPVNS-----<br/>-----PILSFPVNS-----</p>                                                                   | <p><b>Peptide 09</b><br/>E203<br/>E202K</p> <p>REPFVYLKREPLVYKRVYTOGV<br/>REPFVYLKREPLVYKRVYTOGV<br/>-----RPFVYKRV-----<br/>-----RPFVYKRV-----<br/>-----RPFVYKRV-----<br/>-----RPFVYKRV-----</p>           | <p><b>Peptide 10</b><br/>ERN1<br/>P75S</p> <p>LDVPTVSEVAFPLPDRGSLYLGSK<br/>LDVPTVSEVAFPLPDRGSLYLGSK<br/>-----PDRGSLYLG-----<br/>-----PDRGSLYLG-----<br/>-----PDRGSLYLG-----<br/>-----PDRGSLYLG-----</p>                                               | <p>HLA</p> <ul style="list-style-type: none"> <li>A A0101</li> <li>A A0201</li> <li>B B3501</li> <li>B B4001</li> <li>C C0304</li> <li>a NA</li> </ul>                  |
| PT 05 | <p><b>Peptide 01</b><br/>CDE3AP<br/>P17L</p> <p>GLRFRPCAGCPVTPVFRSALAPNLL<br/>GLRFRPCAGCPVTPVFRSALAPNLL<br/>-----LVVQSSAL-----<br/>-----LVVQSSAL-----<br/>-----LVVQSSAL-----<br/>-----LVVQSSAL-----</p>                                                                  | <p><b>Peptide 02</b><br/>C2C2<br/>V26KA</p> <p>ITNANCVQINQVNRQFSGLTNTNFP<br/>ITNANCVQINQVNRQFSGLTNTNFP<br/>-----VQVQVSSGL-----<br/>-----VQVQVSSGL-----<br/>-----VQVQVSSGL-----<br/>-----VQVQVSSGL-----</p>                                                                                | <p><b>Peptide 03</b><br/>SE26L<br/>H57Y</p> <p>QRFICSAPOGGAVINATIGRVLRVYF<br/>QRFICSAPOGGAVINATIGRVLRVYF<br/>-----VYATIGRV-----<br/>-----VYATIGRV-----<br/>-----VYATIGRV-----<br/>-----VYATIGRV-----</p>                                                                | <p><b>Peptide 04</b><br/>CDE3AP<br/>P17S</p> <p>YKRRYKQGTQSEMTVPTVQVTRCPPL<br/>YKRRYKQGTQSEMTVPTVQVTRCPPL<br/>-----KSEVTRCP-----<br/>-----KSEVTRCP-----<br/>-----KSEVTRCP-----<br/>-----KSEVTRCP-----</p>  | <p><b>Peptide 05</b><br/>SLC15A4<br/>M17H</p> <p>FWTACGVYGSIRHNTQSTRM<br/>FWTACGVYGSIRHNTQSTRM<br/>-----RIRGQSHL-----<br/>-----RIRGQSHL-----<br/>-----RIRGQSHL-----<br/>-----RIRGQSHL-----</p>                                                        | <p>HLA</p> <ul style="list-style-type: none"> <li>A A0101</li> <li>A A0201</li> <li>B B3501</li> <li>B B4001</li> <li>C C0304</li> <li>a NA</li> </ul>                  |
|       | <p><b>Peptide 06</b><br/>HST11C<br/>L167R</p> <p>VQTKRCAGCPVTPVFRSALAPNLL<br/>VQTKRCAGCPVTPVFRSALAPNLL<br/>-----LVVQSSAL-----<br/>-----LVVQSSAL-----<br/>-----LVVQSSAL-----<br/>-----LVVQSSAL-----</p>                                                                   | <p><b>Peptide 07</b><br/>NUP188<br/>A617G</p> <p>CYNCLTVLAANRVAFTVRLRHTCTLF<br/>CYNCLTVLAANRVAFTVRLRHTCTLF<br/>-----RFDLRSQK-----<br/>-----RFDLRSQK-----<br/>-----RFDLRSQK-----<br/>-----RFDLRSQK-----</p>                                                                                | <p><b>Peptide 08</b><br/>ZB1B3<br/>P140T</p> <p>SCYACQNTPELPTDGGDKMLVYQSK<br/>SCYACQNTPELPTDGGDKMLVYQSK<br/>-----AGDQKTEF-----<br/>-----AGDQKTEF-----<br/>-----AGDQKTEF-----<br/>-----AGDQKTEF-----</p>                                                                 | <p><b>Peptide 09</b><br/>E203<br/>E202K</p> <p>REPFVYLKREPLVYKRVYTOGV<br/>REPFVYLKREPLVYKRVYTOGV<br/>-----RPFVYKRV-----<br/>-----RPFVYKRV-----<br/>-----RPFVYKRV-----<br/>-----RPFVYKRV-----</p>           | <p><b>Peptide 10</b><br/>ERN1<br/>P75S</p> <p>LDVPTVSEVAFPLPDRGSLYLGSK<br/>LDVPTVSEVAFPLPDRGSLYLGSK<br/>-----PDRGSLYLG-----<br/>-----PDRGSLYLG-----<br/>-----PDRGSLYLG-----<br/>-----PDRGSLYLG-----</p>                                               | <p>HLA</p> <ul style="list-style-type: none"> <li>A A0101</li> <li>A A0201</li> <li>B B3501</li> <li>B B4001</li> <li>C C0304</li> <li>a NA</li> </ul>                  |

|              |                                                                                                                                                                                |                                                                                                                                                                        |                                                                                                                                                                    |                                                                                                                                                                                  |                                                                                                                                                                 |                                                                            |
|--------------|--------------------------------------------------------------------------------------------------------------------------------------------------------------------------------|------------------------------------------------------------------------------------------------------------------------------------------------------------------------|--------------------------------------------------------------------------------------------------------------------------------------------------------------------|----------------------------------------------------------------------------------------------------------------------------------------------------------------------------------|-----------------------------------------------------------------------------------------------------------------------------------------------------------------|----------------------------------------------------------------------------|
| <b>PT 06</b> | <b>Peptide 01</b><br>KVTC1<br>S217L<br>VYVLANLGGKTRAVITTYERR<br>WVLANLGGKTRAVITTYERR<br>---SLTSALV---<br>---KLVPEYKA---<br>---ATVYFPEY---<br>---SSVPTAVT---<br>---SPTQKRSLS--- | <b>Peptide 02</b><br>SPF1<br>P87L<br>TLLANGSRSSKLLPQFKLLSERLL<br>SLLANGSRSSKLLPQFKLLSERLL<br>---SLLTPKPS---<br>---SLLTQKRSLS---<br>---NLSRQKRSLS---<br>---SPTQKRSLS--- | <b>Peptide 03</b><br>CKK3<br>L52M<br>TFKFLQVTVKMLTVEATKSAVIIC<br>TKFPLQVTVKMLTVEATKSAVIIC<br>---KLLVKAATK---<br>---AVDMMNIVK---<br>---KRFPLQVTV---<br>---TFCQLT--- | <b>Peptide 04</b><br>NUP2<br>N12Y<br>TVVALGAVKQKQKSAFATCQKQA<br>TKVALSDFVNDVQAAFAFGQKQA<br>---LSDVADV---<br>---ALLDQKQK---<br>---KVLISQDM---<br>---DTGAAKAP---<br>---RFDQAAAP--- | <b>Peptide 05</b><br>ZNT7A<br>S4F<br>EKALRGTSPSP7SPQKPSFVYIC<br>EKALRGTSPSP7SPQKPSFVYIC<br>---ALRGTSPSP---<br>---SVEFQKQA---<br>---GTSPSPSP---<br>---TSPSPSP--- | HLA<br>● A201<br>● A1101<br>● B1501<br>● B5101<br>● C0304<br>● NA          |
|              | <b>Peptide 06</b><br>ACM3<br>G0R<br>PSNYKSRQGFQIATPYPNPAKVDL<br>PDKYKSRQGFQIATPYPNPAKVDL<br>---ALLSYPNA---<br>---ALLSYPNA---<br>---ADKPLAEET---                                |                                                                                                                                                                        |                                                                                                                                                                    |                                                                                                                                                                                  |                                                                                                                                                                 |                                                                            |
| <b>PT 07</b> | <b>Peptide 01</b><br>MLT6<br>P8H<br>YAFAPAPSSDAPEPKAMITQKVV<br>YAFAPAPSSDAPEPKAMITQKVV<br>---SSTALF---<br>---ALQVYKAS---<br>---SSTALF---<br>---AFSSDA---<br>---SSTALF---       | <b>Peptide 02</b><br>TONL<br>G86E<br>SQGAPYFASLLEKTPSPESLSPFP<br>SQGAPYFASLLEKTPSPESLSPFP<br>---SSTALF---<br>---SSTALF---<br>---SSTALF---<br>---SSTALF---              | <b>Peptide 03</b><br>R0D4<br>G66E<br>SQGPPYFASLLEKTPSPESLSPFP<br>SQGPPYFASLLEKTPSPESLSPFP<br>---SSTALF---<br>---SSTALF---<br>---SSTALF---<br>---SSTALF---          | <b>Peptide 04</b><br>R1F<br>P32S<br>CGGCVATFSGINMTPYKCSAPYQ<br>CGGCVATFSGINMTPYKCSAPYQ<br>---SSTALF---<br>---SSTALF---<br>---SSTALF---<br>---SSTALF---                           | <b>Peptide 05</b><br>KMT2B<br>P164S<br>LDFPAPFSGKAPFAKPSKQRTKV<br>LDFPAPFSGKAPFAKPSKQRTKV<br>---SSTALF---<br>---SSTALF---<br>---SSTALF---<br>---SSTALF---       | HLA<br>● A2402<br>● B1501<br>● C0102<br>● NA                               |
|              | <b>Peptide 07</b><br>R1F<br>P32S<br>CGGCVATFSGINMTPYKCSAPYQ<br>CGGCVATFSGINMTPYKCSAPYQ<br>---SSTALF---<br>---SSTALF---<br>---SSTALF---<br>---SSTALF---                         |                                                                                                                                                                        |                                                                                                                                                                    |                                                                                                                                                                                  |                                                                                                                                                                 |                                                                            |
| <b>PT 08</b> | <b>Peptide 01</b><br>T8F1<br>P13L<br>FLSPVQVLDKSSVYKPKAPKQKDE<br>FLSPVQVLDKSSVYKPKAPKQKDE<br>---SSTALF---<br>---SSTALF---<br>---SSTALF---<br>---SSTALF---                      | <b>Peptide 02</b><br>ABCD1<br>E15V<br>LQATYVYSALVLESLALSRERLVA<br>LQATYVYSALVLESLALSRERLVA<br>---SSTALF---<br>---SSTALF---<br>---SSTALF---<br>---SSTALF---             | <b>Peptide 03</b><br>NUD7B<br>K24P<br>WVINDLKLVAASQYIKLVAKKRD<br>WVINDLKLVAASQYIKLVAKKRD<br>---SSTALF---<br>---SSTALF---<br>---SSTALF---<br>---SSTALF---           | <b>Peptide 04</b><br>P0OZ<br>T27B<br>TQNSRNVAKLVLLTDLKAPKQKDE<br>TQNSRNVAKLVLLTDLKAPKQKDE<br>---SSTALF---<br>---SSTALF---<br>---SSTALF---<br>---SSTALF---                        | <b>Peptide 05</b><br>TCF4<br>P164S<br>KFGKQVQSSMNPRLPSSAKKVO<br>KFGKQVQSSMNPRLPSSAKKVO<br>---SSTALF---<br>---SSTALF---<br>---SSTALF---<br>---SSTALF---          | HLA<br>● A201<br>● A301<br>● B3501<br>● B401<br>● C0304<br>● C0401<br>● NA |
|              | <b>Peptide 08</b><br>T8F1<br>P13L<br>FLSPVQVLDKSSVYKPKAPKQKDE<br>FLSPVQVLDKSSVYKPKAPKQKDE<br>---SSTALF---<br>---SSTALF---<br>---SSTALF---<br>---SSTALF---                      |                                                                                                                                                                        |                                                                                                                                                                    |                                                                                                                                                                                  |                                                                                                                                                                 |                                                                            |
| <b>PT 09</b> | <b>Peptide 01</b><br>SYNE1<br>S10P<br>ELKNDTEKLESLPESLATSREAREK<br>ELKNDTEKLESLPESLATSREAREK<br>---SSTALF---<br>---SSTALF---<br>---SSTALF---<br>---SSTALF---                   | <b>Peptide 02</b><br>PLEKX2<br>T0M<br>SGLVTLVYKNTIPYVTLTKKATQD<br>SGLVTLVYKNTIPYVTLTKKATQD<br>---SSTALF---<br>---SSTALF---<br>---SSTALF---<br>---SSTALF---             | <b>Peptide 03</b><br>PKA2<br>M63I<br>SESANLFFDQNLNMLISKEKFSV<br>SESANLFFDQNLNMLISKEKFSV<br>---SSTALF---<br>---SSTALF---<br>---SSTALF---<br>---SSTALF---            | <b>Peptide 04</b><br>RABEF1<br>M4F<br>SQSQSQAGLTFKPKKTKNEKTR<br>SQSQSQAGLTFKPKKTKNEKTR<br>---SSTALF---<br>---SSTALF---<br>---SSTALF---<br>---SSTALF---                           | <b>Peptide 05</b><br>ZCCCH1<br>M17S<br>PFGGAGPFPKQVYVFPKPPKQV<br>PFGGAGPFPKQVYVFPKPPKQV<br>---SSTALF---<br>---SSTALF---<br>---SSTALF---<br>---SSTALF---         | HLA<br>● A201<br>● B3501<br>● B3801<br>● C0401<br>● NA                     |
|              | <b>Peptide 09</b><br>ANKDZ7<br>S14P<br>KTTDWRPFLGKSPSPNTASPTET<br>KTTDWRPFLGKSPSPNTASPTET<br>---SSTALF---<br>---SSTALF---<br>---SSTALF---<br>---SSTALF---                      |                                                                                                                                                                        |                                                                                                                                                                    |                                                                                                                                                                                  |                                                                                                                                                                 |                                                                            |
| <b>PT 10</b> | <b>Peptide 01</b><br>VSL1<br>S81N<br>KAKTEPEKLEKLEREDAAALQIL<br>KAKTEPEKLEKLEREDAAALQIL<br>---SSTALF---<br>---SSTALF---<br>---SSTALF---<br>---SSTALF---                        | <b>Peptide 02</b><br>VSL1K<br>E13K<br>KANKVQRSEIYVETDANVFLASVL<br>KANKVQRSEIYVETDANVFLASVL<br>---SSTALF---<br>---SSTALF---<br>---SSTALF---<br>---SSTALF---             | <b>Peptide 03</b><br>VPS1B<br>P83S<br>ANAPVSEKELLLVLDKPTKQLES<br>ANAPVSEKELLLVLDKPTKQLES<br>---SSTALF---<br>---SSTALF---<br>---SSTALF---<br>---SSTALF---           | <b>Peptide 04</b><br>CCDZ<br>M54T<br>MHLKAPVYVYKLVNLLDLSLAPRA<br>MHLKAPVYVYKLVNLLDLSLAPRA<br>---SSTALF---<br>---SSTALF---<br>---SSTALF---<br>---SSTALF---                        | <b>Peptide 05</b><br>ABM1L<br>S64P<br>SQVTEVLDKLSLPSKQLQVTSKTSI<br>SQVTEVLDKLSLPSKQLQVTSKTSI<br>---SSTALF---<br>---SSTALF---<br>---SSTALF---<br>---SSTALF---    | HLA<br>● A201<br>● A301<br>● B0702<br>● C0501<br>● C0702<br>● NA           |
|              | <b>Peptide 06</b><br>S3CDA<br>P27S<br>DQKSOLEVQVFIYVNDLIRDAVQD<br>DQKSOLEVQVFIYVNDLIRDAVQD<br>---SSTALF---<br>---SSTALF---<br>---SSTALF---<br>---SSTALF---                     |                                                                                                                                                                        |                                                                                                                                                                    |                                                                                                                                                                                  |                                                                                                                                                                 |                                                                            |
| <b>PT 11</b> | <b>Peptide 01</b><br>ATX<br>L16P<br>GGVLLGKLEKLVKQKSRVSKKLE<br>GGVLLGKLEKLVKQKSRVSKKLE<br>---SSTALF---<br>---SSTALF---<br>---SSTALF---<br>---SSTALF---                         | <b>Peptide 02</b><br>SPTA1<br>E194K<br>KQAVYVKAASDELKTRNDGALG<br>KQAVYVKAASDELKTRNDGALG<br>---SSTALF---<br>---SSTALF---<br>---SSTALF---<br>---SSTALF---                | <b>Peptide 03</b><br>MQR9<br>F31K<br>ASAKKASLVKAFKESVFLAFLLL<br>ASAKKASLVKAFKESVFLAFLLL<br>---SSTALF---<br>---SSTALF---<br>---SSTALF---<br>---SSTALF---            | <b>Peptide 04</b><br>CEP104<br>A141V<br>ELKRVQKLVVLIYVYKSRLLKLTG<br>ELKRVQKLVVLIYVYKSRLLKLTG<br>---SSTALF---<br>---SSTALF---<br>---SSTALF---<br>---SSTALF---                     | <b>Peptide 05</b><br>TKL04<br>E12Q<br>FQATVYKAFYFEEKAKLVKSFVNS<br>FQATVYKAFYFEEKAKLVKSFVNS<br>---SSTALF---<br>---SSTALF---<br>---SSTALF---<br>---SSTALF---      | HLA<br>● A201<br>● B0702<br>● B5701<br>● C0602<br>● C0702<br>● NA          |
|              | <b>Peptide 07</b><br>S8P7<br>D14Y<br>VYKLVKQKSDYDEKTRLSAVVAA<br>VYKLVKQKSDYDEKTRLSAVVAA<br>---SSTALF---<br>---SSTALF---<br>---SSTALF---<br>---SSTALF---                        |                                                                                                                                                                        |                                                                                                                                                                    |                                                                                                                                                                                  |                                                                                                                                                                 |                                                                            |
| <b>PT 12</b> | <b>Peptide 01</b><br>ST0N1<br>L17H<br>PQAGSLGKPSKLLPQVYKRCDAFS<br>PQAGSLGKPSKLLPQVYKRCDAFS<br>---SSTALF---<br>---SSTALF---<br>---SSTALF---<br>---SSTALF---                     | <b>Peptide 02</b><br>SEC16A<br>P23L<br>DLFAAGPSSGKVFVMPAALAGAZ<br>DLFAAGPSSGKVFVMPAALAGAZ<br>---SSTALF---<br>---SSTALF---<br>---SSTALF---<br>---SSTALF---              | <b>Peptide 03</b><br>S4H<br>R41L<br>KIKSKYVLSGSEFVQVYKRVYVHT<br>KIKSKYVLSGSEFVQVYKRVYVHT<br>---SSTALF---<br>---SSTALF---<br>---SSTALF---<br>---SSTALF---           | <b>Peptide 04</b><br>KDMA<br>Q21E<br>LDPLGKAPFVLEKQKLVVYKRSI<br>LDPLGKAPFVLEKQKLVVYKRSI<br>---SSTALF---<br>---SSTALF---<br>---SSTALF---<br>---SSTALF---                          | <b>Peptide 05</b><br>NRP2<br>A23V<br>YLKRVNSKEMAAHRTYTFLL<br>YLKRVNSKEMAAHRTYTFLL<br>---SSTALF---<br>---SSTALF---<br>---SSTALF---<br>---SSTALF---               | HLA<br>● A201<br>● B1501<br>● B401<br>● C0304<br>● NA                      |
|              | <b>Peptide 06</b><br>ZFK3<br>V07L<br>DFAPVAMTFAVYKIFPLMLOGG<br>DFAPVAMTFAVYKIFPLMLOGG<br>---SSTALF---<br>---SSTALF---<br>---SSTALF---<br>---SSTALF---                          |                                                                                                                                                                        |                                                                                                                                                                    |                                                                                                                                                                                  |                                                                                                                                                                 |                                                                            |
