# Supplementary material for: Dose escalation study of a personalized peptide-based neoantigen vaccine (EVX-01) in patients with metastatic melanoma
Source: PubMed Central journal article supplement — J Immunother Cancer. 2024 May 23;12(5):e008817. doi: 10.1136/jitc-2024-008817 (PMC11116868; doi:10.1136/jitc-2024-008817), 2024-05-23
Supplement: jitc-2024-008817supp014.pdf [file jitc-2024-008817supp014.pdf]

Supplementary Table 1 | Cluster information

| Patient | Cluster | Peptide sequence | HLA   | Mutated | EVX-01 peptide | Color 1  | Color 2  |
|---------|---------|------------------|-------|---------|----------------|----------|----------|
| 1       | 1       | GPEFKKTL         | B0801 | no      | 1              | BV650    | PE       |
| 1       | 1       | GPEFKKTL         | B0702 | no      | 1              | BV711    | PE-CF594 |
| 1       | 1       | IGPVDHIEF        | A2402 | no      | 1              | PE       | PE-CF594 |
| 1       | 1       | GPVDHIEFF        | B0702 | yes     | 1              | BUV737   | PE-CF594 |
| 1       | 1       | SGPEFKKTL        | C0701 | no      | 1              | BUV737   | PE-Cy7   |
| 1       | 1       | LAARYRNVL        | B0702 | yes     | 2              | PE       | PE-Cy7   |
| 1       | 1       | RYRNVLEAL        | A2402 | no      | 2              | PE-CF594 | PE-Cy7   |
| 1       | 1       | SPYEISIRQRF      | B0702 | no      | 3              | BV650    | PE-CF594 |
| 1       | 1       | SALPRNTVV        | C0701 | no      | 4              | BV711    | PE       |
| 1       | 1       | SIYNNVLQL        | C0701 | yes     | 5              | BV650    | PE-Cy7   |
| 1       | 1       | SIYNNVLQL        | C0701 | yes     | 5              | BV650    | PE-Cy7   |
| 1       | 1       | DLKSIYNNV        | B0801 | yes     | 5              | BUV737   | PE       |
| 1       | 2       | GPEFKKTL         | B0801 | no      | 1              | BV650    | PE       |
| 1       | 3       | SGPEFKKTL        | B0801 | no      | 1              | BV421    | BV786    |
| 1       | 3       | GPEFKKTL         | B0801 | no      | 1              | BV650    | PE       |
| 1       | 3       | SGPEFKKTL        | C0702 | no      | 1              | BUV395   | BV650    |
| 1       | 3       | SLQPDLAARY       | A0101 | yes     | 2              | APC      | PE       |
| 1       | 3       | RYRNVLEALW       | A2402 | no      | 2              | APC      | BUV395   |
| 1       | 3       | VKTRMQSL         | B0801 | no      | 2              | BUV395   | PE       |
| 1       | 3       | DVDDIKVYSPY      | A0101 | yes     | 3              | APC      | BV421    |
| 1       | 3       | YEISIRQRF        | C0702 | no      | 3              | BUV737   | BV786    |
| 1       | 3       | ALPRNTVVL        | C0702 | yes     | 4              | BV421    | BV650    |
| 1       | 3       | APRRASSAL        | B0702 | yes     | 4              | BV421    | PE       |
| 1       | 3       | RAPRRASSAL       | B0702 | yes     | 4              | BV786    | PE       |
| 1       | 3       | SIYNNVLQL        | B0801 | yes     | 5              | BUV395   | BV421    |
| 1       | 3       | IYNNVLQL         | C0702 | yes     | 5              | BV650    | BV786    |
| 1       | 3       | IYNNVLQL         | C0701 | yes     | 5              | APC      | BV650    |
| 1       | 3       | NVPDLKSIY        | A0101 | yes     | 5              | APC      | BV786    |
| 1       | 4       | LPRNTVVL         | B0801 | no      | 4              | BV786    | PE-Cy7   |
| 1       | 5       | QSLQPDLAARY      | A0101 | yes     | 2              | APC      | PE-CF594 |
| 1       | 6       | LAARYRNVL        | B0702 | yes     | 2              | PE       | PE-Cy7   |
| 2       | 1       | HYINSIKNL        | A2402 | yes     | 1              | BV421    | PE       |
| 2       | 1       | AIGEIDKVHY       | B1501 | yes     | 1              | BV650    | PE       |
| 2       | 1       | YYGDILSL         | A2402 | yes     | 3              | BV650    | PE-CF594 |
| 2       | 1       | MIGPLTQQM        | A0201 | yes     | 4              | BV421    | PE-CF594 |
| 2       | 1       | IFLLDEPTAGL      | C0401 | no      | 6              | BV421    | BV650    |
| 2       | 1       | LLDEPTAGL        | A0201 | no      | 6              | PE       | PE-CF594 |
| 2       | 2       | AAIGEIDKVHY      | B1501 | yes     | 1              | BUV737   | PE       |

|   |   |             |       |     |    |          |          |
|---|---|-------------|-------|-----|----|----------|----------|
| 2 | 2 | TQQMNHLSL   | B1501 | no  | 4  | BV786    | PE-Cy7   |
| 2 | 2 | YFNEKMFIL   | A2402 | yes | 5  | BV786    | PE       |
| 2 | 2 | AYFNEKMFIL  | A2402 | yes | 5  | PE       | PE-Cy7   |
| 2 | 2 | LLDEPTAGL   | A0201 | no  | 6  | PE       | PE-CF594 |
| 2 | 2 | FLLDEPTAGL  | A0201 | no  | 6  | PE-CF594 | PE-Cy7   |
| 2 | 2 | SFSRHQVW    | A2402 | yes | 6  | BUV737   | PE-CF594 |
| 2 | 2 | MSSPPKSSL   | C0401 | yes | 7  | BUV737   | BV786    |
| 2 | 2 | LPTEKEVAL   | C0401 | no  | 9  | BUV737   | PE-Cy7   |
| 2 | 2 | ALLHIVTSI   | A0201 | yes | 10 | BV786    | PE-CF594 |
| 2 | 3 | YFNEKMFIL   | C0401 | yes | 5  | BUV395   | BV650    |
| 2 | 4 | HYINSIKNL   | A2402 | yes | 1  | BV421    | PE       |
| 2 | 4 | AIGEIDKVHY  | B1501 | yes | 1  | BV650    | PE       |
| 2 | 4 | VHYINSIKNL  | A2402 | yes | 1  | BUV395   | PE-CF594 |
| 2 | 4 | YYGDILSL    | A2402 | yes | 3  | BV650    | PE-CF594 |
| 2 | 4 | YYYGDILSL   | A2402 | yes | 3  | BUV395   | PE       |
| 2 | 4 | MIGPLTQQM   | A0201 | yes | 4  | BV421    | PE-CF594 |
| 2 | 4 | YFNEKMFIL   | C0401 | yes | 5  | BUV395   | BV650    |
| 2 | 4 | IFLLDEPTAGL | C0401 | no  | 6  | BV421    | BV650    |
| 2 | 4 | LLDEPTAGL   | A0201 | no  | 6  | PE       | PE-CF594 |
| 2 | 4 | RTYSGEKPY   | B1501 | yes | 8  | BUV395   | BV421    |
| 3 | 1 | PFDPKVV     | C0401 | no  | 1  | BUV737   | BV421    |
| 3 | 1 | MPFDPKVV    | C0401 | no  | 1  | BUV737   | BV786    |
| 3 | 1 | HFSYFSRSL   | C0401 | no  | 7  | BV421    | BV650    |
| 3 | 1 | LPRIFRSSY   | B3501 | yes | 8  | BV421    | BV786    |
| 3 | 1 | RADLPRIFF   | C0401 | no  | 8  | BV650    | BV786    |
| 3 | 2 | AIDSPVSL    | C0401 | yes | 4  | BUV395   | BV650    |
| 3 | 3 | EVHIPGSPFK  | A1101 | no  | 1  | APC      | PE-CF594 |
| 3 | 4 | SPVSLAL     | B3501 | yes | 4  | PE       | PE-Cy7   |
| 4 | 1 | YQAWDSVPSL  | A0201 | yes | 1  | BV650    | PE-CF594 |
| 4 | 1 | HLYQAWDSV   | A0201 | yes | 1  | BUV737   | PE-CF594 |
| 4 | 1 | EEQGAQLGV   | B1801 | no  | 3  | BV711    | PE-CF594 |
| 4 | 1 | EEQGAQLGVVL | B1801 | yes | 3  | PE       | PE-Cy7   |
| 4 | 1 | SSFSHHQKI   | C0701 | no  | 5  | BV711    | PE       |
| 4 | 1 | IRTFQEQL    | C0701 | yes | 6  | BUV737   | PE-Cy7   |
| 4 | 1 | YTKSLVEKI   | C0701 | no  | 7  | BV650    | PE-Cy7   |
| 4 | 1 | ILSEKNENGL  | A0201 | yes | 7  | PE       | PE-CF594 |
| 4 | 1 | DELLEFINST  | B1801 | no  | 8  | BV650    | PE       |
| 4 | 1 | DELLEFINS   | B1801 | no  | 8  | BUV737   | PE       |
| 4 | 1 | ELLEFINST   | A0201 | no  | 8  | PE-CF594 | PE-Cy7   |
| 4 | 1 | KSHPLYNKV   | C0701 | yes | 9  | BV711    | PE-Cy7   |
| 4 | 2 | ENIATHHLY   | C0701 | no  | 1  | BV421    | BV650    |
| 4 | 2 | YQAWDSVPSL  | A0201 | yes | 1  | BV650    | PE-CF594 |
| 4 | 2 | QAWDSVPSL   | C0701 | yes | 1  | BUV395   | BV650    |

|   |   |             |       |     |    |        |          |
|---|---|-------------|-------|-----|----|--------|----------|
| 4 | 2 | HLYQAWDSV   | A0201 | yes | 1  | BUV737 | PE-CF594 |
| 4 | 2 | LFAGFPGTF   | C0701 | no  | 2  | BUV395 | BV421    |
| 4 | 2 | LQPShLRS�   | C0701 | no  | 3  | BUV737 | BV421    |
| 4 | 2 | EEQGAQLGV   | B1801 | no  | 3  | BV711  | PE-CF594 |
| 4 | 2 | MEPFHPMV    | B1801 | no  | 4  | BV421  | PE       |
| 4 | 2 | SSRDFRPFL   | C0701 | yes | 4  | BUV395 | BUV737   |
| 4 | 2 | SSFHHQKI    | C0701 | no  | 5  | BV711  | PE       |
| 4 | 2 | QLQGKIRTF   | C0701 | yes | 6  | BUV395 | BV711    |
| 4 | 2 | ILSEKNENGL  | A0201 | yes | 7  | PE     | PE-CF594 |
| 4 | 2 | KNENGLIGNTF | B1801 | yes | 7  | BUV395 | PE       |
| 4 | 2 | FINSTKPKV   | A0201 | yes | 8  | BV421  | PE-CF594 |
| 4 | 2 | DELLEFINST  | B1801 | no  | 8  | BV650  | PE       |
| 4 | 2 | DELLEFINS   | B1801 | no  | 8  | BUV737 | PE       |
| 4 | 2 | ILKKSHPLY   | C0701 | yes | 9  | BV421  | BV711    |
| 4 | 2 | FLSDPNDGSL  | A0201 | yes | 10 | BUV395 | PE-CF594 |
| 4 | 3 | ENIATHHLY   | C0701 | no  | 1  | BV421  | BV650    |
| 4 | 3 | YQAWDSVPSL  | A0201 | yes | 1  | BV650  | PE-CF594 |
| 4 | 3 | QAWDSVPSL   | C0701 | yes | 1  | BUV395 | BV650    |
| 4 | 3 | HLYQAWDSV   | A0201 | yes | 1  | BUV737 | PE-CF594 |
| 4 | 3 | LFAGFPGTF   | C0701 | no  | 2  | BUV395 | BV421    |
| 4 | 3 | LQPShLRS�   | C0701 | no  | 3  | BUV737 | BV421    |
| 4 | 3 | EEQGAQLGV   | B1801 | no  | 3  | BV711  | PE-CF594 |
| 4 | 3 | MEPFHPMV    | B1801 | no  | 4  | BV421  | PE       |
| 4 | 3 | SSRDFRPFL   | C0701 | yes | 4  | BUV395 | BUV737   |
| 4 | 3 | SSFHHQKI    | C0701 | no  | 5  | BV711  | PE       |
| 4 | 3 | QLQGKIRTF   | C0701 | yes | 6  | BUV395 | BV711    |
| 4 | 3 | ILSEKNENGL  | A0201 | yes | 7  | PE     | PE-CF594 |
| 4 | 3 | KNENGLIGNTF | B1801 | yes | 7  | BUV395 | PE       |
| 4 | 3 | FINSTKPKV   | A0201 | yes | 8  | BV421  | PE-CF594 |
| 4 | 3 | DELLEFINST  | B1801 | no  | 8  | BV650  | PE       |
| 4 | 3 | DELLEFINS   | B1801 | no  | 8  | BUV737 | PE       |
| 4 | 3 | ILKKSHPLY   | C0701 | yes | 9  | BV421  | BV711    |
| 4 | 3 | FLSDPNDGSL  | A0201 | yes | 10 | BUV395 | PE-CF594 |
| 4 | 4 | ENIATHHLY   | C0701 | no  | 1  | BV421  | BV650    |
| 4 | 4 | QAWDSVPSL   | C0701 | yes | 1  | BUV395 | BV650    |
| 4 | 4 | ENIATHHLY   | B1801 | no  | 1  | BV786  | PE-Cy7   |
| 4 | 4 | LFAGFPGTF   | C0701 | no  | 2  | BUV395 | BV421    |
| 4 | 4 | AGFPGTFFL   | C0701 | yes | 2  | BUV737 | BV786    |
| 4 | 4 | FLFAGFPGT   | A0201 | no  | 2  | APC    | PE       |
| 4 | 4 | VLLQPShLRS� | A0201 | yes | 3  | APC    | BV421    |
| 4 | 4 | LQPShLRS�   | C0701 | no  | 3  | BUV737 | BV421    |
| 4 | 4 | LLQPShLRS�  | A0201 | yes | 3  | APC    | PE-Cy7   |
| 4 | 4 | EEQGAQLGVVL | B1801 | yes | 3  | PE     | PE-Cy7   |

|   |   |             |       |     |    |        |          |
|---|---|-------------|-------|-----|----|--------|----------|
| 4 | 4 | MEPFHPMV    | B1801 | no  | 4  | BV421  | PE       |
| 4 | 4 | AMEPFHPMV   | A0201 | no  | 4  | APC    | BV786    |
| 4 | 4 | SRDFRPFL    | C0701 | no  | 4  | BUV395 | BV786    |
| 4 | 4 | AMEPFHPMVNL | A0201 | no  | 4  | APC    | BUV395   |
| 4 | 4 | SSRDFRPFL   | C0701 | yes | 4  | BUV395 | BUV737   |
| 4 | 4 | KAFSYPSSF   | C0701 | yes | 5  | BV650  | BV786    |
| 4 | 4 | FSYPSSFH    | C0701 | yes | 5  | APC    | BV650    |
| 4 | 4 | SSFSHHQKI   | C0701 | no  | 5  | BV711  | PE       |
| 4 | 4 | QLQGKIRTF   | C0701 | yes | 6  | BUV395 | BV711    |
| 4 | 4 | LENGPNTQL   | B1801 | no  | 6  | BV786  | PE       |
| 4 | 4 | QLENGPNTQL  | A0201 | no  | 6  | APC    | BUV737   |
| 4 | 4 | IRTFQEQL    | C0701 | yes | 6  | BUV737 | PE-Cy7   |
| 4 | 4 | YTKSLVEKI   | C0701 | no  | 7  | BV650  | PE-Cy7   |
| 4 | 4 | GLIGNTFST   | A0201 | no  | 7  | APC    | BV711    |
| 4 | 4 | KNENGLIGNTF | B1801 | yes | 7  | BUV395 | PE       |
| 4 | 4 | NENGLIGNTF  | B1801 | yes | 7  | BUV395 | PE-Cy7   |
| 4 | 4 | DELLEFINST  | B1801 | no  | 8  | BV650  | PE       |
| 4 | 4 | DELLEFINS   | B1801 | no  | 8  | BUV737 | PE       |
| 4 | 4 | ILKKSHPLY   | C0701 | yes | 9  | BV421  | BV711    |
| 4 | 4 | REPFVPII    | B1801 | no  | 9  | BV421  | PE-Cy7   |
| 4 | 4 | KSHPLYNKV   | C0701 | yes | 9  | BV711  | PE-Cy7   |
| 4 | 4 | THVEEPAFL   | C0701 | no  | 10 | BV421  | BV786    |
| 4 | 5 | THVEEPAFL   | C0701 | no  | 10 | BV421  | BV786    |
| 4 | 6 | SLSPATTGA   | A0201 | no  | 1  | APC    | PE-CF594 |
| 4 | 7 | FLFAGFPGT   | A0201 | no  | 2  | APC    | PE       |
| 5 | 1 | YNATIGRVL   | C0304 | yes | 3  | BV421  | BV786    |
| 5 | 2 | LVTGPRSAI   | C0304 | yes | 1  | BV786  | PE-Cy7   |
| 5 | 2 | RSALAPNLL   | C0304 | no  | 1  | BUV395 | PE-Cy7   |
| 5 | 2 | YNATIGRVL   | C0304 | yes | 3  | BV421  | BV786    |
| 5 | 2 | NATIGRVL    | C0304 | no  | 3  | BUV395 | BV421    |
| 5 | 2 | WTDLRHTGF   | C0304 | no  | 7  | BUV395 | BV786    |
| 5 | 2 | AQDGNTEPL   | B4001 | no  | 8  | BV421  | PE-Cy7   |
| 5 | 3 | QESRMSETV   | B4001 | yes | 4  | BV650  | PE       |
| 5 | 3 | VPQEEMPGPPL | B3503 | no  | 4  | BV650  | PE-CF594 |
| 5 | 3 | RMSETVPQEEM | A0201 | yes | 4  | PE     | PE-CF594 |
| 5 | 3 | LPTDSGDKNL  | B3503 | yes | 8  | BV421  | PE       |
| 5 | 3 | AQDGNTEPL   | A0201 | no  | 8  | BV421  | PE-CF594 |
| 5 | 4 | DPAQRFSSTL  | B3503 | yes | 2  | BUV737 | PE-CF594 |
| 5 | 4 | QESRMSETV   | B4001 | yes | 4  | BV650  | PE       |
| 5 | 4 | VPQEEMPGPPL | B3503 | no  | 4  | BV650  | PE-CF594 |
| 5 | 4 | RMSETVPQEEM | A0201 | yes | 4  | PE     | PE-CF594 |
| 5 | 4 | QEEMPGPPL   | B4001 | no  | 4  | BUV737 | PE       |
| 5 | 4 | RIDEQSHRL   | B3503 | yes | 5  | BV711  | PE-CF594 |

|   |    |             |       |     |   |          |          |
|---|----|-------------|-------|-----|---|----------|----------|
| 5 | 4  | RIDEQSHRL   | A0201 | yes | 5 | PE-CF594 | PE-Cy7   |
| 5 | 4  | NPGKVVWTDL  | B3503 | yes | 7 | PE       | PE-Cy7   |
| 5 | 5  | QLNDPAQRF   | A0101 | yes | 2 | APC      | PE-CF594 |
| 5 | 5  | ATIGRVLSPSY | A0101 | no  | 3 | APC      | PE       |
| 5 | 5  | RMSETVPQEEM | A0201 | yes | 4 | PE       | PE-CF594 |
| 5 | 6  | NPLVTGPRRAL | B3503 | yes | 1 | BV786    | PE-CF594 |
| 5 | 7  | NATIGRVL    | C0304 | no  | 3 | BUV395   | BV421    |
| 5 | 8  | LVTGPRRAL   | C0304 | yes | 1 | BV786    | PE-Cy7   |
| 5 | 9  | SETVPQEEM   | B4001 | yes | 4 | BUV395   | PE       |
| 5 | 10 | LVTGPRRAL   | B3503 | yes | 1 | BUV395   | PE-CF594 |
| 5 | 10 | NATIGRVL    | C0304 | no  | 3 | BUV395   | BV421    |
| 5 | 10 | QESRMSETV   | B4001 | yes | 4 | BV650    | PE       |
| 5 | 10 | VPQEEMPGPPL | B3503 | no  | 4 | BV650    | PE-CF594 |
| 5 | 10 | RMSETVPQEEM | A0201 | yes | 4 | PE       | PE-CF594 |
| 5 | 10 | SETVPQEEM   | B4001 | yes | 4 | BUV395   | PE       |
| 5 | 10 | LPTDSGDKNL  | B3503 | yes | 8 | BV421    | PE       |
| 5 | 10 | AQDGNTEPL   | A0201 | no  | 8 | BV421    | PE-CF594 |
| 5 | 11 | LVTGPRRAL   | C0304 | yes | 1 | BV786    | PE-Cy7   |
| 5 | 11 | RSALAPNLL   | C0304 | no  | 1 | BUV395   | PE-Cy7   |
| 5 | 11 | YNATIGRVL   | C0304 | yes | 3 | BV421    | BV786    |
| 5 | 11 | NATIGRVL    | C0304 | no  | 3 | BUV395   | BV421    |
| 5 | 11 | WTDLRHTGF   | C0304 | no  | 7 | BUV395   | BV786    |
| 5 | 11 | AQDGNTEPL   | B4001 | no  | 8 | BV421    | PE-Cy7   |
| 6 | 1  | PPLQVTKV    | B5101 | no  | 3 | BV421    | BV786    |
| 6 | 2  | RIPEYFNFAK  | A1101 | yes | 6 | BV650    | PE-CF594 |
| 6 | 3  | EALVLITEY   | B5101 | yes | 1 | BV650    | PE       |
| 6 | 3  | ALVLITEY    | B1501 | yes | 1 | BV711    | PE-CF594 |
| 6 | 3  | LPIQKPKL    | B5101 | yes | 2 | BV786    | PE-Cy7   |
| 6 | 3  | RLPIQKPK    | A1101 | yes | 2 | PE       | PE-CF594 |
| 6 | 3  | MQRESRRL    | B1501 | yes | 2 | PE       | PE-Cy7   |
| 6 | 3  | MIVDKATKK   | A1101 | yes | 3 | PE-CF594 | PE-Cy7   |
| 6 | 3  | YQAAPAFGF   | B1501 | yes | 4 | BV786    | PE       |
| 6 | 3  | KVALSDVK    | A1101 | no  | 4 | BV786    | PE-CF594 |
| 6 | 3  | RPSVIFQPEQK | A1101 | yes | 5 | BUV737   | PE-CF594 |
| 6 | 3  | RIPEYFNFAK  | A1101 | yes | 6 | BV650    | PE-CF594 |
| 6 | 3  | KQDFKLRIPEY | B1501 | yes | 6 | BUV737   | PE       |
| 6 | 4  | SLDEALVLI   | A0201 | yes | 1 | APC      | PE-CF594 |
| 6 | 5  | EALVLITEY   | B5101 | yes | 1 | BV650    | PE       |
| 6 | 5  | ALVLITEY    | B1501 | yes | 1 | BV711    | PE-CF594 |
| 6 | 5  | RLPIQKPK    | A1101 | yes | 2 | PE       | PE-CF594 |
| 6 | 5  | RIPEYFNFAK  | A1101 | yes | 6 | BV650    | PE-CF594 |
| 6 | 6  | LPIQKPKL    | B5101 | yes | 2 | BV786    | PE-Cy7   |
| 6 | 7  | LSLDEALVL   | C0304 | yes | 1 | BUV395   | BV421    |

|   |   |             |       |     |   |          |          |
|---|---|-------------|-------|-----|---|----------|----------|
| 6 | 7 | LPIQKPKLL   | C0304 | yes | 2 | BUV737   | BV421    |
| 6 | 7 | ISRPSVIF    | C0304 | yes | 5 | BUV395   | BUV737   |
| 6 | 8 | LSLDEALVL   | C0304 | yes | 1 | BUV395   | BV421    |
| 6 | 8 | EALVLITEY   | B5101 | yes | 1 | BV650    | PE       |
| 6 | 8 | LPIQKPKLL   | C0304 | yes | 2 | BUV737   | BV421    |
| 6 | 8 | RLLPIQKPK   | A1101 | yes | 2 | PE       | PE-CF594 |
| 6 | 8 | KVENNMIVDK  | A1101 | yes | 3 | BV421    | PE-CF594 |
| 6 | 8 | GVYQAAPAF   | B1501 | yes | 4 | BV421    | PE       |
| 6 | 8 | GISRPSVIF   | B1501 | yes | 5 | BUV395   | PE       |
| 6 | 8 | SVIFQPEQK   | A1101 | yes | 5 | BUV395   | PE-CF594 |
| 6 | 8 | RPSVIFQPEQK | A1101 | yes | 5 | BUV737   | PE-CF594 |
| 6 | 8 | ISRPSVIF    | C0304 | yes | 5 | BUV395   | BUV737   |
| 6 | 8 | RIPEYFNFAK  | A1101 | yes | 6 | BV650    | PE-CF594 |
| 6 | 8 | KQDFKLRIPEY | B1501 | yes | 6 | BUV737   | PE       |
| 7 | 1 | PSAPPSPSAL  | C0102 | yes | 1 | BUV395   | BV421    |
| 8 | 1 | FVNSAIRYL   | A0201 | no  | 2 | APC      | PE-Cy7   |
| 8 | 1 | VDINDKLLK   | B4001 | no  | 3 | BV421    | PE-Cy7   |
| 8 | 1 | KLYASPSQFI  | A0201 | yes | 3 | APC      | BV421    |
| 8 | 1 | NEVAKLVNIL  | B4001 | yes | 4 | BV421    | BV786    |
| 8 | 1 | GENSNEVAKL  | B4001 | no  | 4 | BV786    | PE-Cy7   |
| 8 | 1 | KLVNILNTI   | A0201 | yes | 4 | APC      | BV786    |
| 8 | 2 | KSLVVSKPPAK | A0301 | yes | 1 | BV421    | PE       |
| 8 | 2 | NILNTIPSL   | C0401 | yes | 4 | BV421    | BV650    |
| 8 | 2 | KPGSQYYQY   | B3501 | no  | 5 | BV650    | PE       |
| 8 | 3 | KLYASPSQFIK | A0301 | yes | 3 | BV786    | PE-CF594 |
| 8 | 4 | QTIQKSLVV   | C0304 | yes | 1 | BUV395   | BV421    |
| 8 | 4 | KSLVVSKPPAK | A0301 | yes | 1 | BV421    | PE       |
| 8 | 4 | FVNSAIRYL   | C0304 | no  | 2 | BUV737   | BV421    |
| 8 | 4 | LPATFVNSA   | B3501 | no  | 2 | BUV395   | PE       |
| 8 | 4 | YASPSQFIKL  | C0304 | yes | 3 | BUV395   | BUV737   |
| 8 | 4 | DINDKLLKY   | B3501 | no  | 3 | BUV737   | PE       |
| 9 | 1 | KLSEFFLL    | A0201 | yes | 1 | APC      | PE-Cy7   |
| 9 | 1 | DTEKKLSEF   | B3501 | no  | 1 | PE       | PE-CF594 |
| 9 | 1 | FLLKTSSSHEA | A0201 | yes | 1 | APC      | PE-CF594 |
| 9 | 1 | LMNDTEKKL   | A0201 | no  | 1 | APC      | PE       |
| 9 | 1 | MTIPVYTTL   | B3501 | yes | 2 | PE-CF594 | PE-Cy7   |
| 9 | 1 | MTIPVYTTL   | A0201 | yes | 2 | APC      | BV786    |
| 9 | 1 | HHILSGKEF   | B3801 | no  | 3 | PE       | PE-Cy7   |
| 9 | 1 | HQVQIPLYNF  | B3801 | yes | 5 | BV786    | PE-Cy7   |
| 9 | 1 | FPQSPAQY    | B3501 | no  | 5 | BV786    | PE-CF594 |
| 9 | 2 | DTEKKLSEF   | B3501 | no  | 1 | PE       | PE-CF594 |
| 9 | 2 | KKLSEFFLL   | B3801 | yes | 1 | BV650    | PE-CF594 |
| 9 | 2 | SPFDMKILL   | B3501 | yes | 3 | BV421    | PE-CF594 |

|    |   |             |       |     |   |          |          |
|----|---|-------------|-------|-----|---|----------|----------|
| 9  | 2 | LHHILSGKEF  | B3801 | no  | 3 | BV421    | PE       |
| 9  | 2 | AQSLTFFKF   | B3801 | yes | 4 | BV650    | PE       |
| 9  | 3 | LMNDTEKKL   | C0401 | no  | 1 | BUV395   | BV421    |
| 9  | 3 | MTIPVY TTL  | C0401 | yes | 2 | BUV737   | BV421    |
| 9  | 3 | PFD MKILL   | C0401 | yes | 3 | BUV395   | BV786    |
| 9  | 3 | SPFDMKILL   | C0401 | yes | 3 | BUV395   | BUV737   |
| 9  | 3 | RHFERFDRNI  | B3801 | yes | 6 | BV421    | BV786    |
| 9  | 4 | MTIPVY TTL  | A0201 | yes | 2 | APC      | BV786    |
| 9  | 5 | LMNDTEKKL   | C0401 | no  | 1 | BUV395   | BV421    |
| 9  | 5 | KKLSEFFLL   | B3801 | yes | 1 | BV650    | PE-CF594 |
| 9  | 5 | DTEKKLSEF   | B3501 | no  | 1 | PE       | PE-CF594 |
| 9  | 5 | MTIPVY TTL  | C0401 | yes | 2 | BUV737   | BV421    |
| 9  | 5 | MTIPVY TTL  | B3801 | yes | 2 | BV711    | PE-CF594 |
| 9  | 5 | LHHILSGKEF  | B3801 | no  | 3 | BV421    | PE       |
| 9  | 5 | SPFDMKILL   | B3501 | yes | 3 | BV421    | PE-CF594 |
| 9  | 5 | SPFDMKILL   | B3801 | yes | 3 | BUV395   | PE       |
| 9  | 5 | SPFDMKILL   | C0401 | yes | 3 | BUV395   | BUV737   |
| 9  | 5 | AQSLTFFKF   | B3801 | yes | 4 | BV650    | PE       |
| 9  | 5 | SQGAQSLTF   | B3801 | no  | 4 | BUV737   | PE       |
| 9  | 5 | AQPPHQVQI   | C0401 | yes | 5 | BV711    | PE       |
| 9  | 5 | YNFPQSPPAQY | B3501 | no  | 5 | BUV395   | PE-CF594 |
| 9  | 5 | KTIEDVREF   | B3501 | no  | 6 | BUV737   | PE-CF594 |
| 9  | 6 | KKLSEFFLL   | B3801 | yes | 1 | BV650    | PE-CF594 |
| 9  | 6 | DTEKKLSEF   | B3501 | no  | 1 | PE       | PE-CF594 |
| 9  | 6 | MTIPVY TTL  | B3801 | yes | 2 | BV711    | PE-CF594 |
| 9  | 6 | MTIPVY TTL  | B3501 | yes | 2 | PE-CF594 | PE-Cy7   |
| 9  | 6 | HHILSGKEF   | B3801 | no  | 3 | PE       | PE-Cy7   |
| 9  | 6 | AQSLTFFKF   | B3801 | yes | 4 | BV650    | PE       |
| 9  | 6 | SQGAQSLTF   | B3801 | no  | 4 | BUV737   | PE       |
| 9  | 6 | AQPPHQVQI   | C0401 | yes | 5 | BV711    | PE       |
| 9  | 6 | FERFDRNIASF | C0401 | yes | 6 | BV650    | PE-Cy7   |
| 9  | 6 | KTIEDVREF   | B3501 | no  | 6 | BUV737   | PE-CF594 |
| 9  | 6 | RFRDNIASF   | C0401 | no  | 6 | BUV737   | PE-Cy7   |
| 9  | 7 | MTIPVY TTL  | C0401 | yes | 2 | BUV737   | BV421    |
| 9  | 7 | LHHILSGKEF  | B3801 | no  | 3 | BV421    | PE       |
| 9  | 7 | AQSLTFFKF   | B3801 | yes | 4 | BV650    | PE       |
| 9  | 7 | SQGAQSLTF   | B3801 | no  | 4 | BUV737   | PE       |
| 10 | 1 | EAKKLTTEL   | B0702 | no  | 1 | BUV395   | PE-CF594 |
| 10 | 1 | QWDEDSVKY   | C0702 | yes | 2 | BV421    | BV786    |
| 10 | 1 | MPANPVRIAF  | B0702 | no  | 2 | BUV737   | PE-CF594 |
| 10 | 1 | SGKEKLISL   | C0702 | yes | 3 | BUV395   | BV421    |
| 10 | 1 | MHLELREGL   | C0702 | no  | 5 | BUV737   | BV421    |
| 10 | 1 | RISSFLGKK   | A0301 | yes | 6 | BV421    | PE-CF594 |

|    |   |             |       |     |    |          |          |
|----|---|-------------|-------|-----|----|----------|----------|
| 10 | 1 | SFLGKKPSL   | C0702 | yes | 6  | BUV395   | BV786    |
| 10 | 1 | INWDAVFQK   | A0301 | no  | 7  | BV786    | PE-CF594 |
| 10 | 1 | SQLSDVQNF   | C0702 | no  | 7  | BUV395   | BUV737   |
| 10 | 2 | KLDKEQAAL   | C0501 | no  | 1  | BV421    | PE       |
| 10 | 2 | APVDSGKEKL  | B0702 | no  | 3  | BV650    | PE-CF594 |
| 10 | 2 | SLLQGSDTK   | A0301 | yes | 3  | PE       | PE-CF594 |
| 10 | 2 | STDLKNNLL   | C0501 | yes | 5  | BV650    | PE       |
| 10 | 2 | GLTRMSTDLK  | A0301 | yes | 5  | PE-CF594 | PE-Cy7   |
| 10 | 2 | RISSFLGKK   | A0301 | yes | 6  | BV421    | PE-CF594 |
| 10 | 2 | HIDIPRISSF  | C0501 | yes | 6  | BV421    | PE-Cy7   |
| 10 | 2 | IPRISSFL    | B0702 | yes | 6  | BV711    | PE-CF594 |
| 10 | 2 | TPIQGGIPAL  | B0702 | yes | 8  | PE       | PE-Cy7   |
| 10 | 3 | EAKKLTTEL   | B0702 | no  | 1  | BUV395   | PE-CF594 |
| 10 | 4 | IPRISSFL    | B0702 | yes | 6  | BV711    | PE-CF594 |
| 10 | 5 | KLDKEQAAL   | A0201 | no  | 1  | APC      | PE-CF594 |
| 10 | 6 | GLTRMSTDLK  | A0301 | yes | 5  | PE-CF594 | PE-Cy7   |
| 10 | 7 | INWDAVFQK   | A0301 | no  | 7  | BV786    | PE-CF594 |
| 11 | 1 | RRVQKQLEV   | C0702 | no  | 4  | BV421    | BV786    |
| 11 | 2 | GRNVKSRKL   | C0702 | no  | 1  | BV786    | PE-Cy7   |
| 11 | 2 | KADVVEAW    | B5701 | no  | 2  | BV421    | PE-CF594 |
| 11 | 2 | RSEPFLAPLLL | B5701 | no  | 3  | BV786    | PE-CF594 |
| 11 | 2 | RRSEPFLAPL  | C0702 | no  | 3  | BUV395   | PE-Cy7   |
| 11 | 2 | RRVQKQLEV   | C0702 | no  | 4  | BV421    | BV786    |
| 11 | 2 | HKAQHISRF   | C0702 | no  | 5  | BUV395   | BV421    |
| 11 | 2 | ATQPNPAVFIF | B5701 | no  | 5  | BUV395   | PE-CF594 |
| 11 | 2 | AWKPESPFW   | C0702 | yes | 9  | BUV395   | BV786    |
| 11 | 2 | HRQPPPLQQ   | C0602 | no  | 10 | BV421    | PE-Cy7   |
| 11 | 2 | RPTLPAAPAF  | B0702 | yes | 10 | PE-CF594 | PE-Cy7   |
| 11 | 3 | RSEPFLAPLLL | B5701 | no  | 3  | BV786    | PE-CF594 |
| 12 | 1 | FQSDDDHPQF  | B4001 | yes | 1  | PE       | PE-Cy7   |
| 12 | 1 | MLFYNAQQL   | C0304 | yes | 2  | BV421    | PE-Cy7   |
| 12 | 1 | YVLGQNSPL   | C0304 | yes | 3  | BV786    | PE-Cy7   |
| 12 | 1 | WELEGSTL    | B4001 | yes | 4  | BV421    | PE       |
| 12 | 1 | AAVHRTRYF   | C0304 | yes | 5  | BUV395   | PE-Cy7   |
| 12 | 1 | MAAMTPALL   | C0304 | yes | 6  | BV421    | BV786    |
| 12 | 1 | GEIPLDMRL   | B4001 | no  | 6  | BV786    | PE       |
| 12 | 1 | SAKSSLSQI   | C0304 | no  | 7  | BUV395   | BV421    |
| 12 | 1 | TQEPYQVL    | B4001 | no  | 8  | BUV395   | PE       |
| 12 | 1 | KVLQSHMSL   | C0304 | no  | 9  | BUV395   | BV786    |
| 12 | 2 | MAAMTPALL   | C0304 | yes | 6  | BV421    | BV786    |
| 12 | 3 | FQSDDDHPQF  | C0304 | yes | 1  | BV650    | PE       |
| 12 | 3 | FQSDDDHPQF  | B4001 | yes | 1  | PE       | PE-Cy7   |
| 12 | 3 | FQSDDDHPQF  | B1501 | yes | 1  | PE-CF594 | PE-Cy7   |



|    |   |             |       |     |    |        |          |
|----|---|-------------|-------|-----|----|--------|----------|
| 12 | 3 | MLFYNPAQL   | C0304 | yes | 2  | BV421  | PE-Cy7   |
| 12 | 3 | SVPEVIHYY   | B1501 | no  | 3  | BV421  | PE-CF594 |
| 12 | 3 | WELEGSTL    | B4001 | yes | 4  | BV421  | PE       |
| 12 | 3 | AAVHRTRYF   | C0304 | yes | 5  | BUV395 | PE-Cy7   |
| 12 | 3 | SAKSSLSQI   | C0304 | no  | 7  | BUV395 | BV421    |
| 12 | 3 | SQIFSAATSH  | B1501 | yes | 7  | BUV395 | PE-CF594 |
| 12 | 3 | TQEPPYQVL   | C0304 | no  | 8  | BUV737 | BV421    |
| 12 | 3 | TQEPPYQVL   | B4001 | no  | 8  | BUV395 | PE       |
| 12 | 3 | TQEPPYQVL   | B1501 | no  | 8  | BUV737 | PE-CF594 |
| 12 | 3 | KVLQSHMSL   | B1501 | no  | 9  | BV650  | PE-CF594 |
| 12 | 3 | DEEEVLPLL   | B4001 | yes | 9  | BUV737 | PE       |
| 12 | 3 | ELLQGLAYF   | B1501 | yes | 10 | BV711  | PE-CF594 |
| 12 | 3 | GLAYFPETI   | A0201 | yes | 10 | PE     | PE-CF594 |
| 12 | 3 | IAGSDAPSL   | C0304 | no  | 10 | BUV395 | BUV737   |
| 12 | 4 | FQSDDDHPQF  | B4001 | yes | 1  | PE     | PE-Cy7   |
| 12 | 4 | MLFYNPAQL   | C0304 | yes | 2  | BV421  | PE-Cy7   |
| 12 | 4 | YVLGQNSPL   | C0304 | yes | 3  | BV786  | PE-Cy7   |
| 12 | 4 | SPLFDSVPEV  | A0201 | yes | 3  | APC    | PE       |
| 12 | 4 | WELEGSTL    | B4001 | yes | 4  | BV421  | PE       |
| 12 | 4 | FLDQLAKFWEL | A0201 | no  | 4  | APC    | PE-Cy7   |
| 12 | 4 | NMSESMAAV   | A0201 | yes | 5  | APC    | BV421    |
| 12 | 4 | AAVHRTRYF   | C0304 | yes | 5  | BUV395 | PE-Cy7   |
| 12 | 4 | MAAMTPALL   | C0304 | yes | 6  | BV421  | BV786    |
| 12 | 4 | ALLGGEIPL   | A0201 | yes | 6  | APC    | BV786    |
| 12 | 4 | GEIPLDMRL   | B4001 | no  | 6  | BV786  | PE       |
| 12 | 4 | SAKSSLSQI   | C0304 | no  | 7  | BUV395 | BV421    |
| 12 | 4 | SLSQIFSAA   | A0201 | yes | 7  | APC    | BUV395   |
| 12 | 4 | TQEPPYQVL   | B4001 | no  | 8  | BUV395 | PE       |
| 12 | 4 | KVLQSHMSL   | C0304 | no  | 9  | BUV395 | BV786    |
