# Supplementary figures and images for: Dose escalation study of a personalized peptide-based neoantigen vaccine (EVX-01) in patients with metastatic melanoma
Source: PubMed Central journal article supplement — J Immunother Cancer. 2024 May 23;12(5):e008817. doi: 10.1136/jitc-2024-008817 (PMC11116868; doi:10.1136/jitc-2024-008817), 2024-05-23

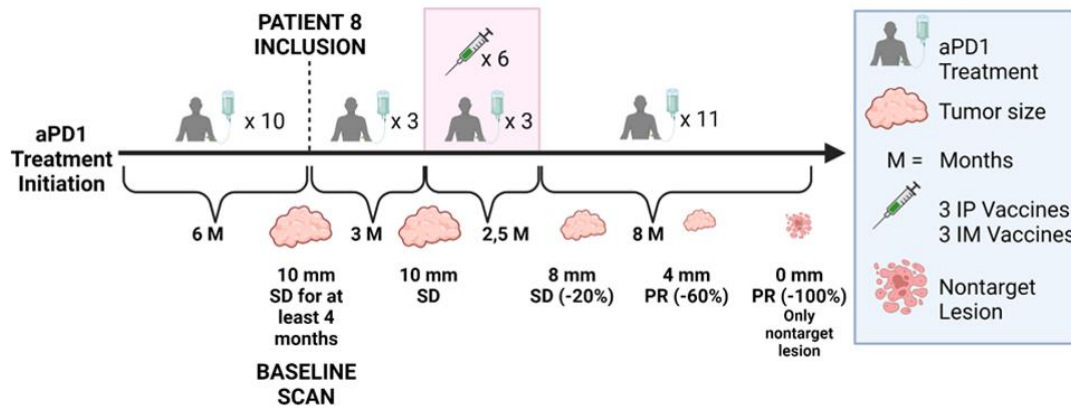

Supplement: jitc-2024-008817supp002.pdf [file jitc-2024-008817supp002.pdf]

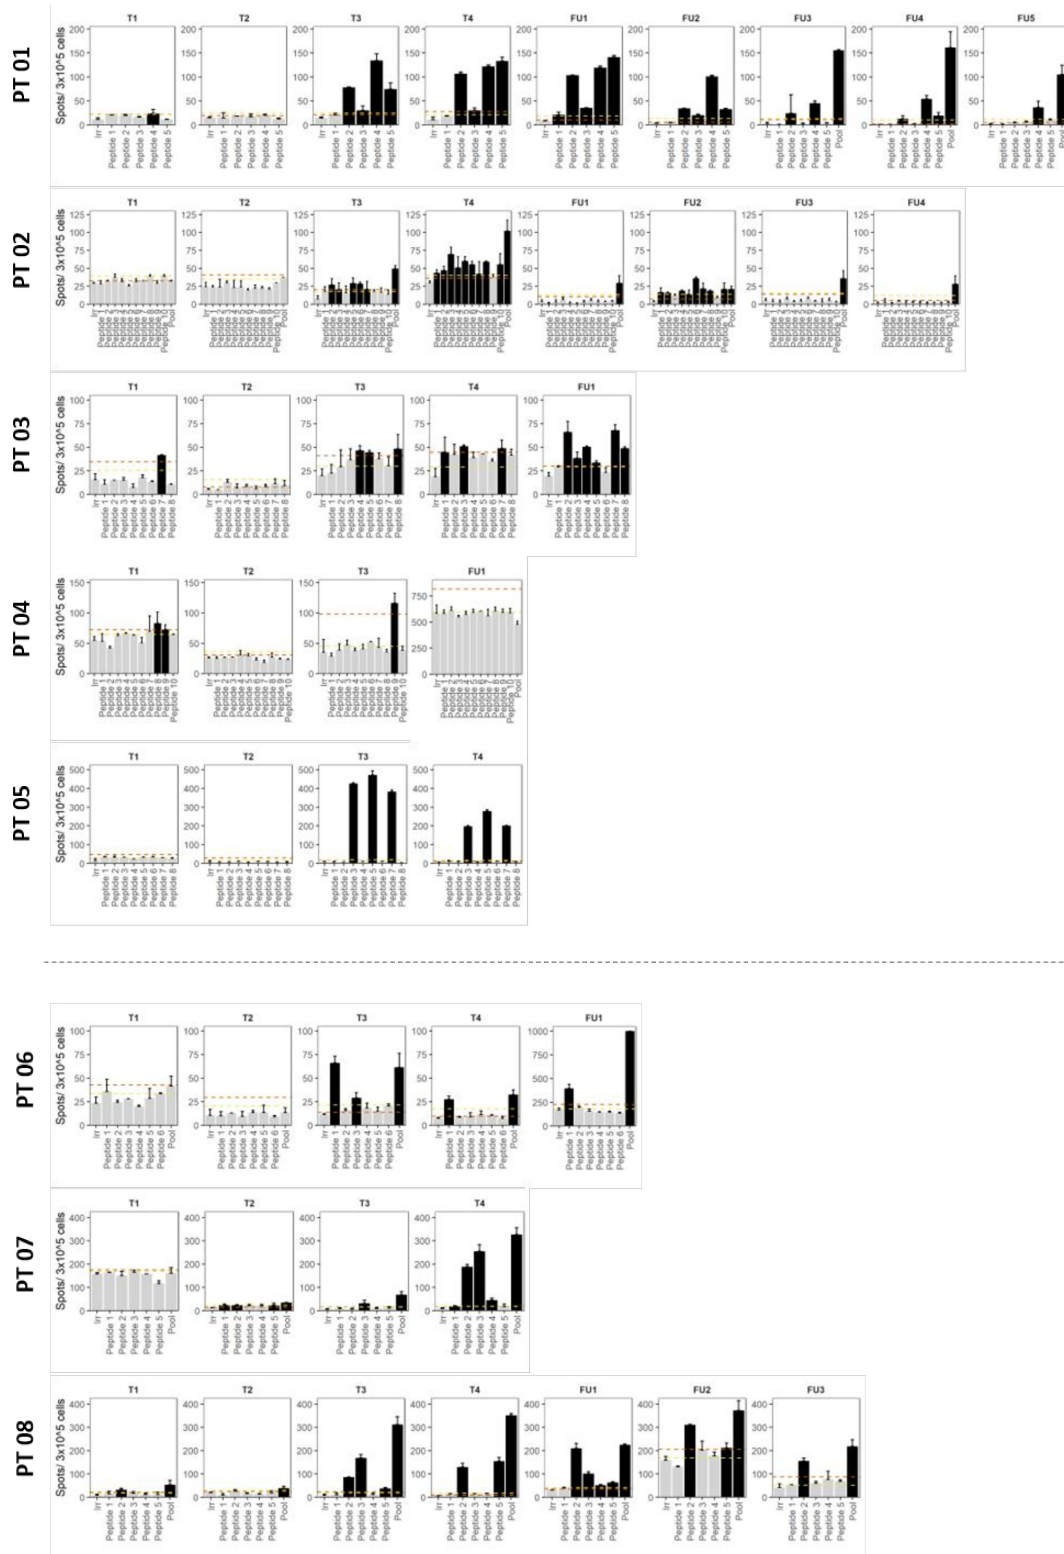

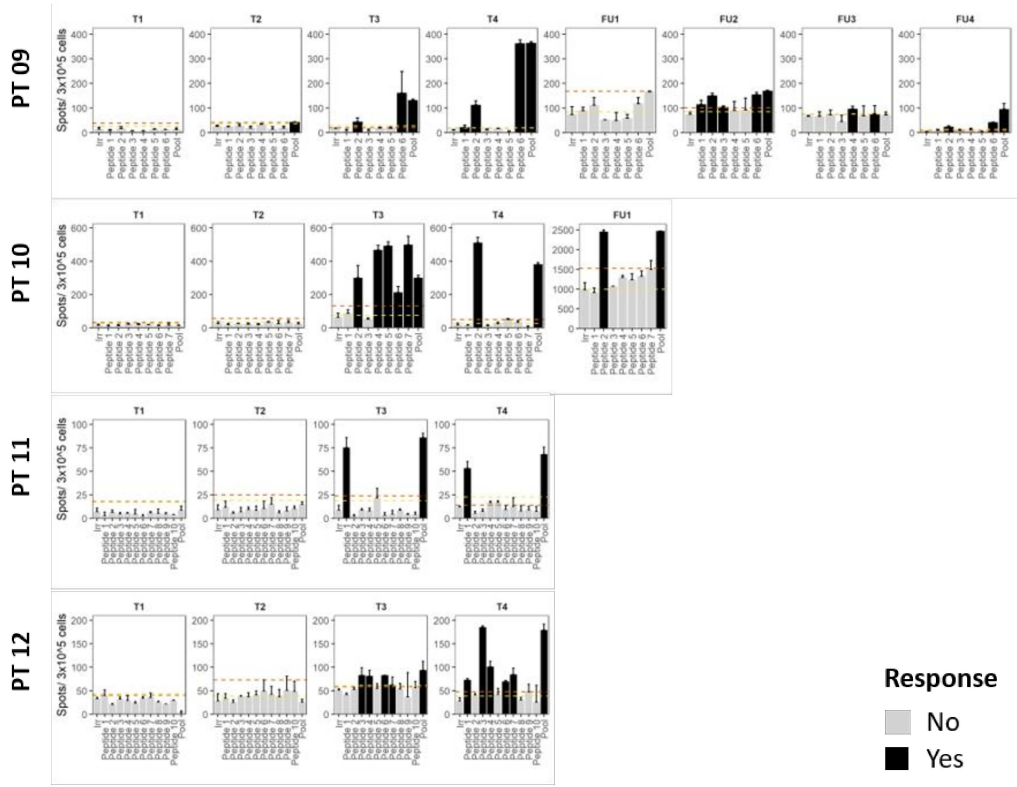

Supplement: jitc-2024-008817supp003.pdf [file jitc-2024-008817supp003.pdf]

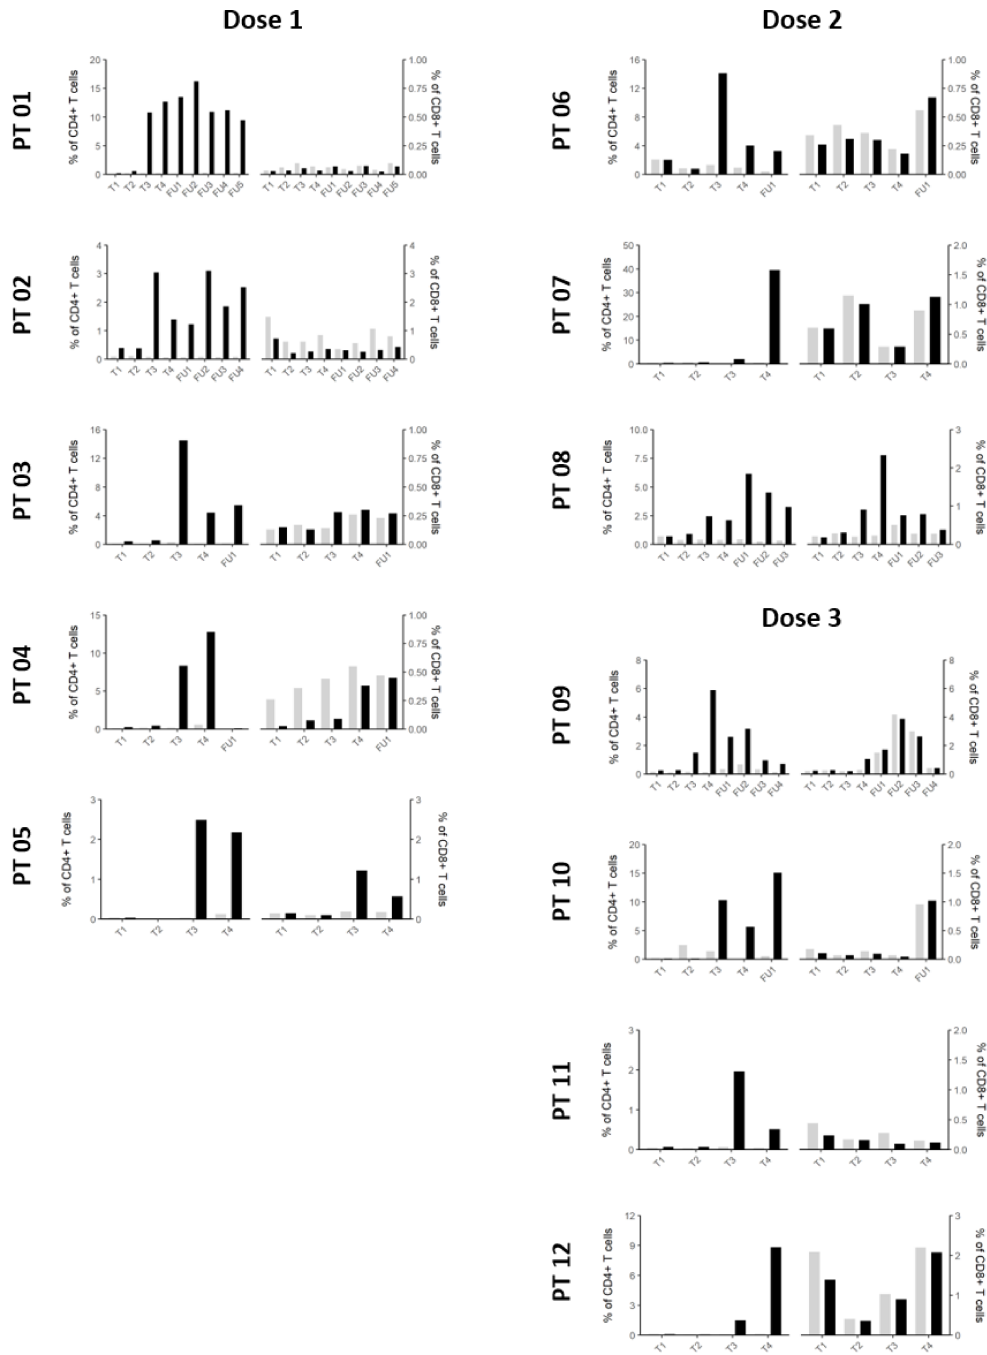

Supplement: jitc-2024-008817supp005.pdf [file jitc-2024-008817supp005.pdf]

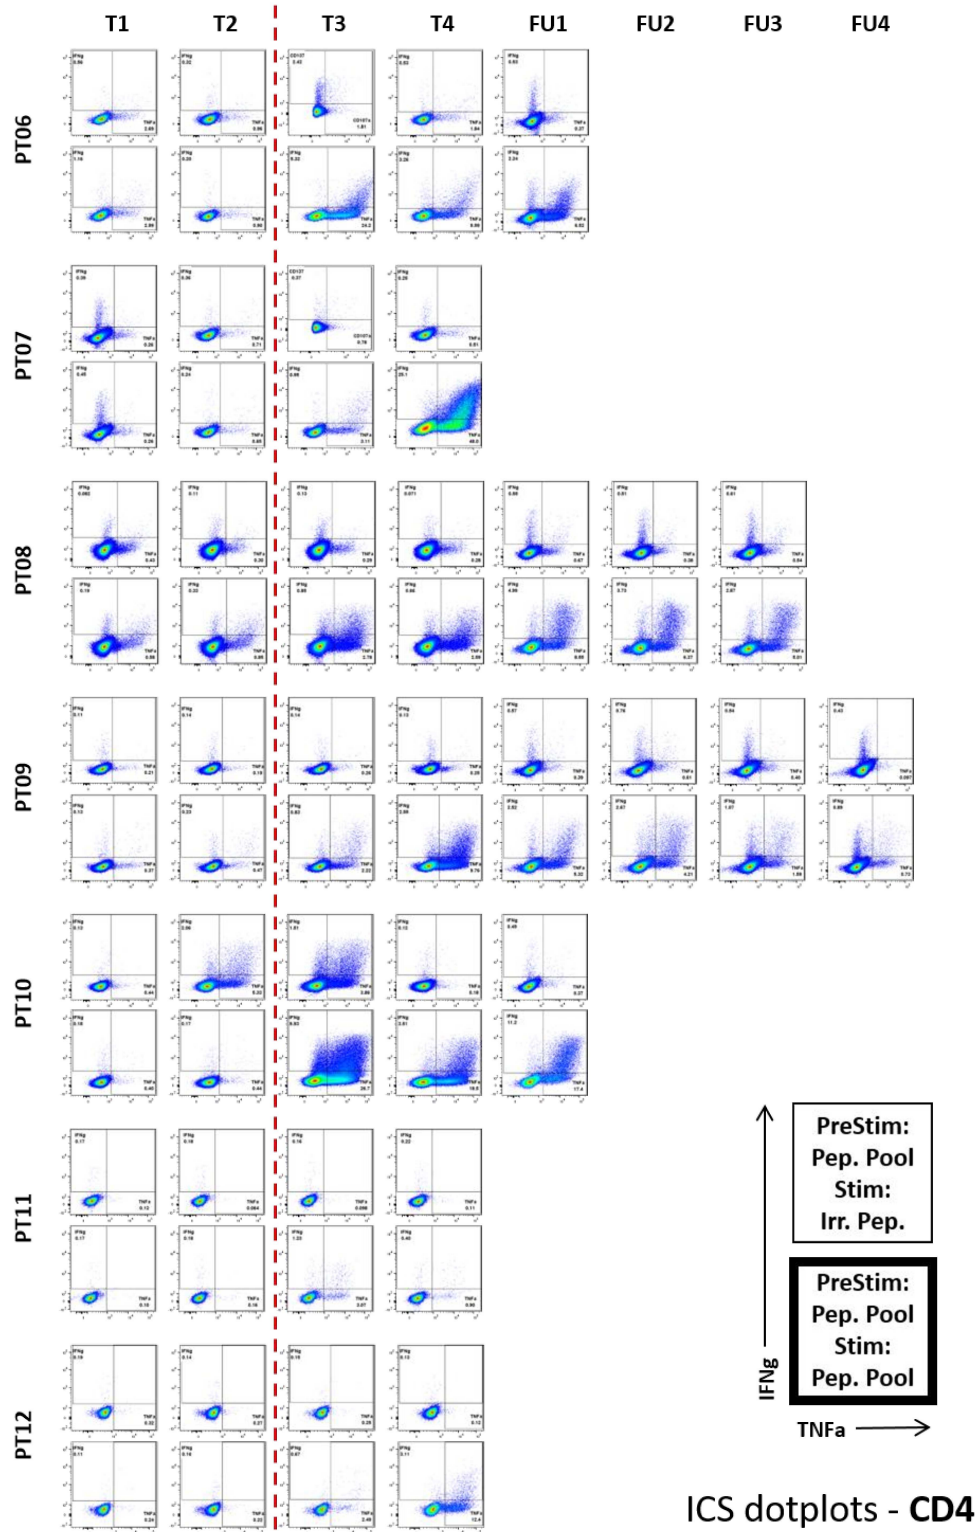

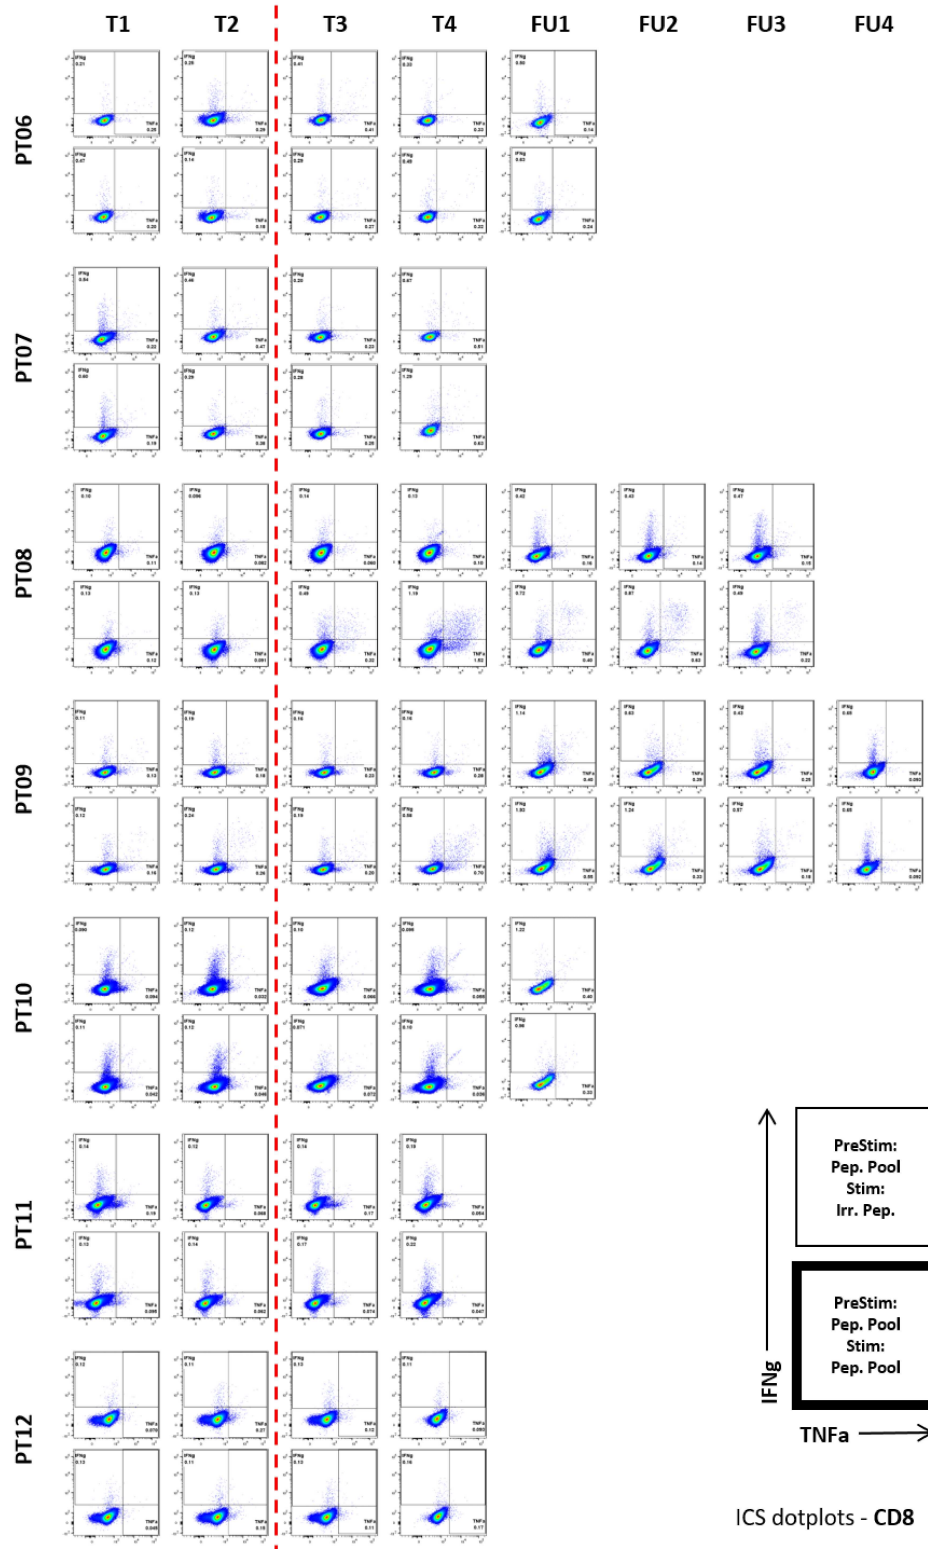

Supplement: jitc-2024-008817supp006.pdf [file jitc-2024-008817supp006.pdf]

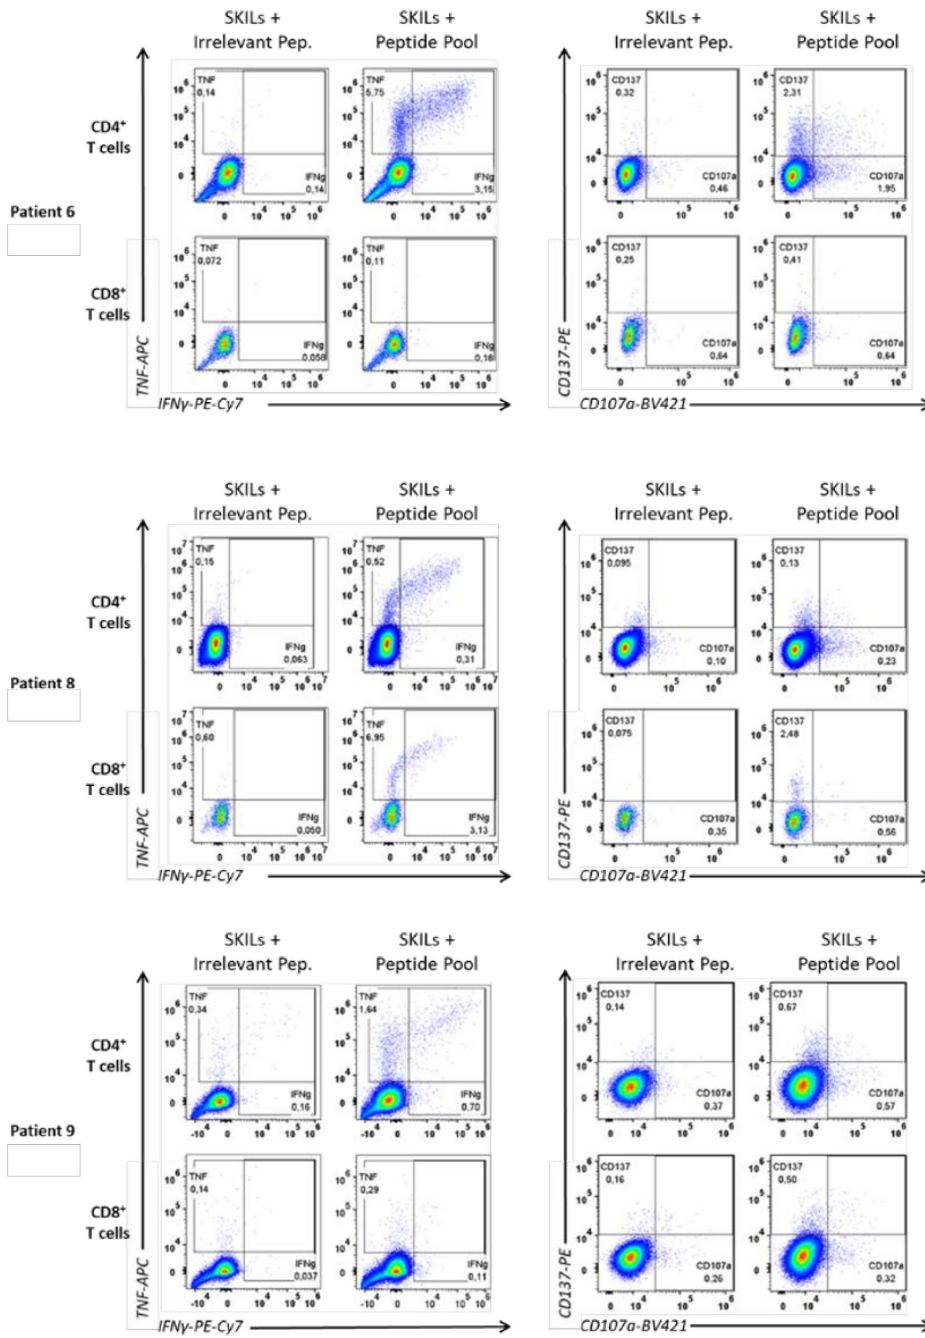

Supplement: jitc-2024-008817supp007.pdf [file jitc-2024-008817supp007.pdf]

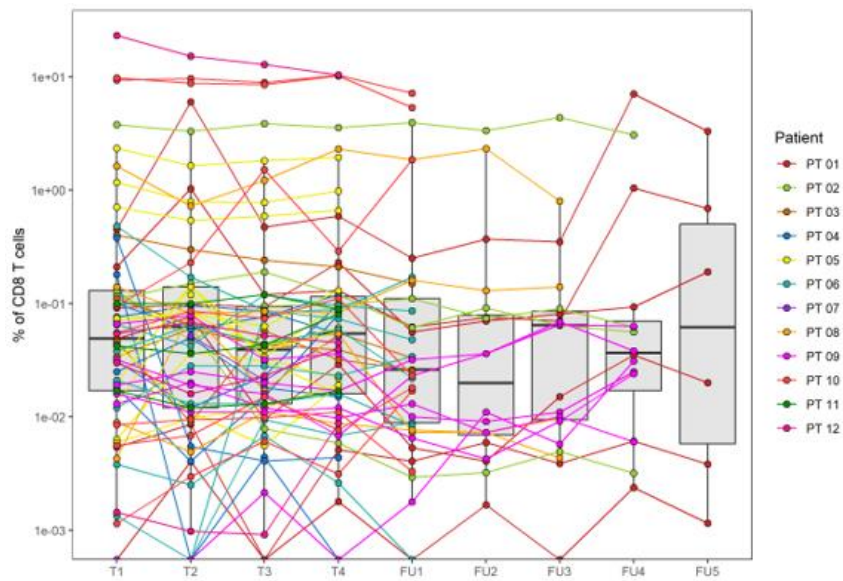

Supplement: jitc-2024-008817supp008.pdf [file jitc-2024-008817supp008.pdf]

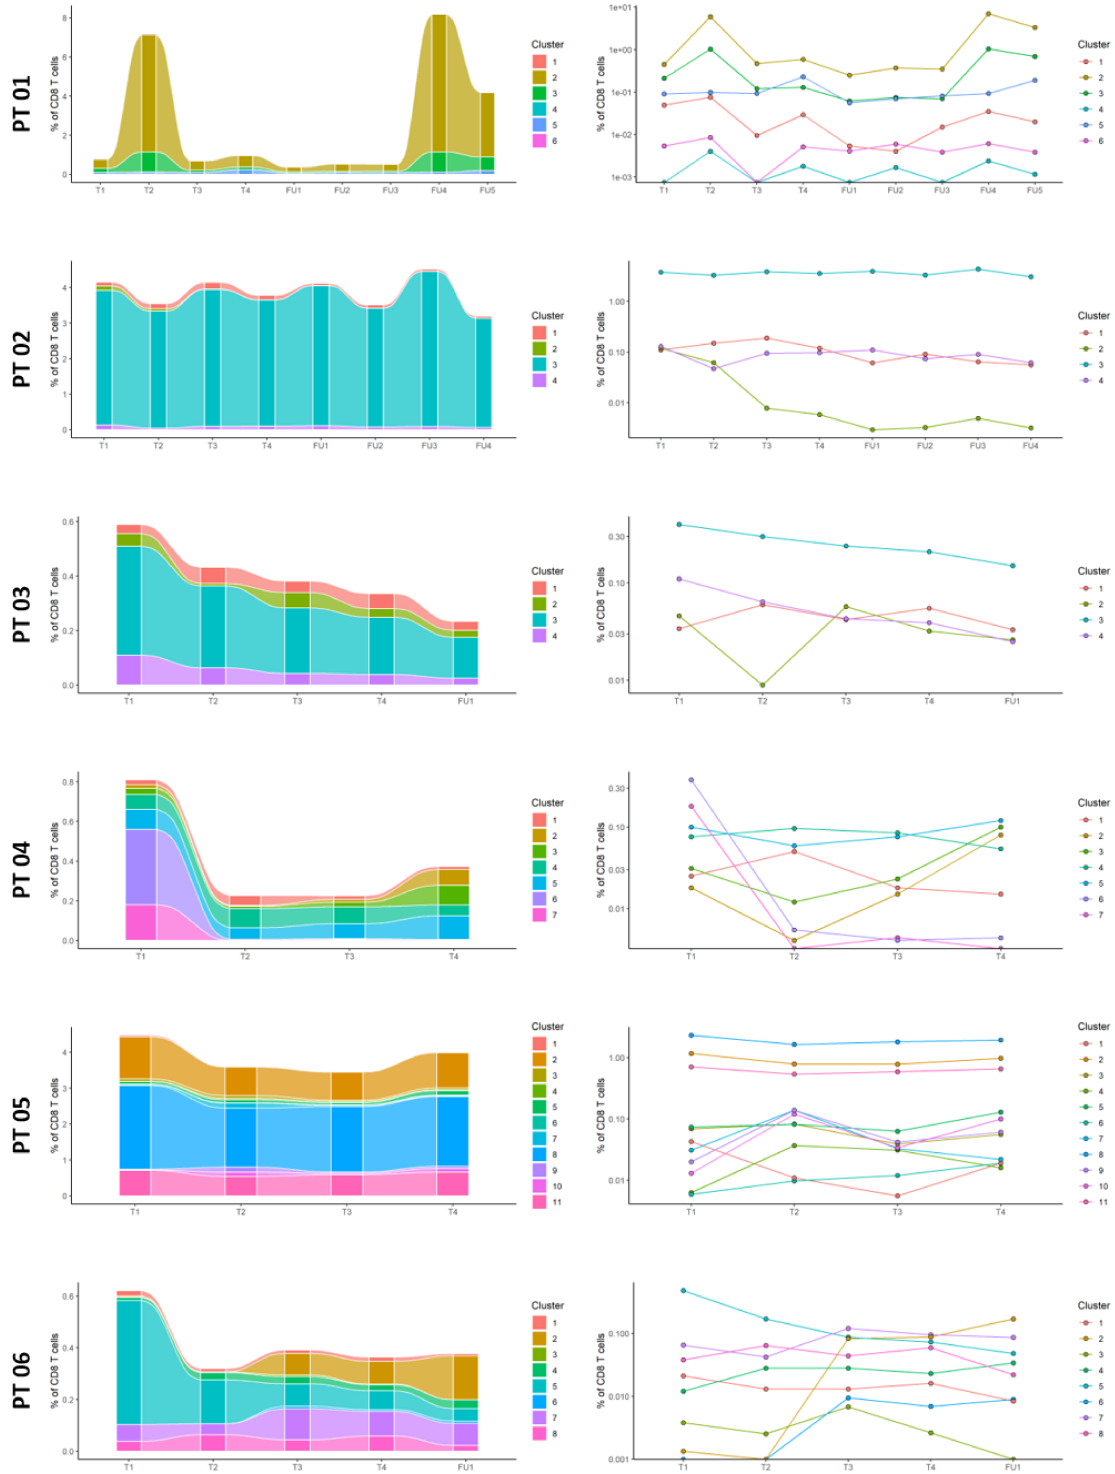

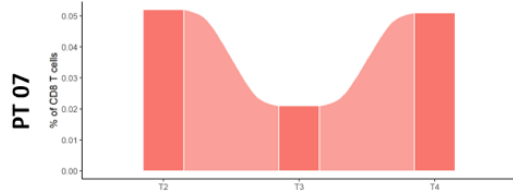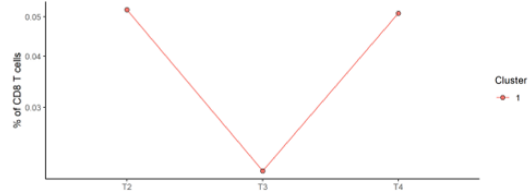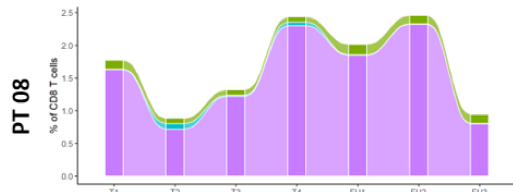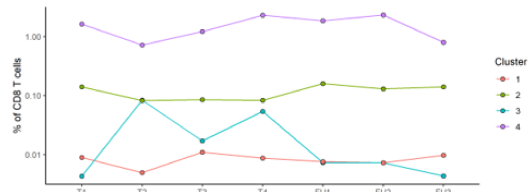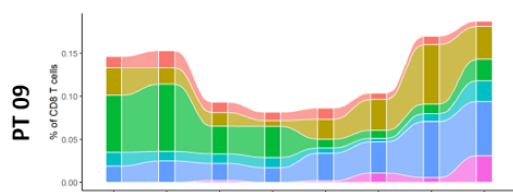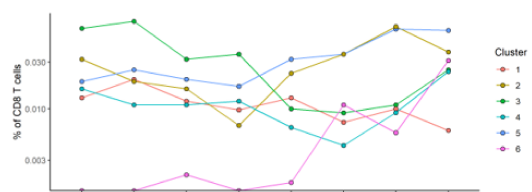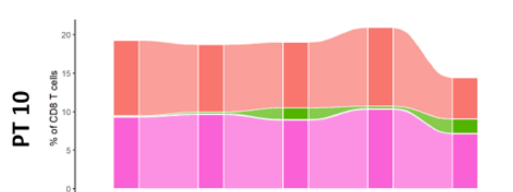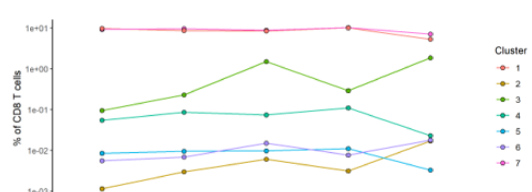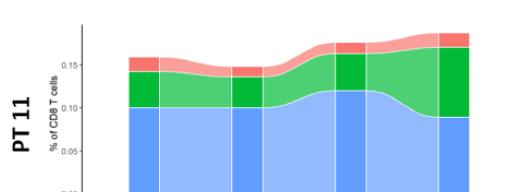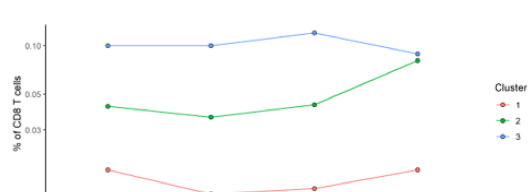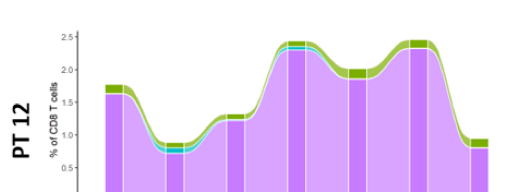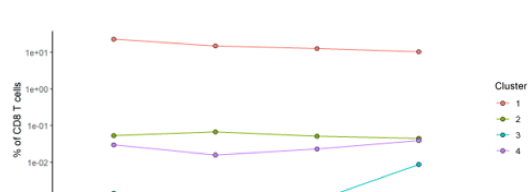

Supplement: jitc-2024-008817supp009.pdf [file jitc-2024-008817supp009.pdf]

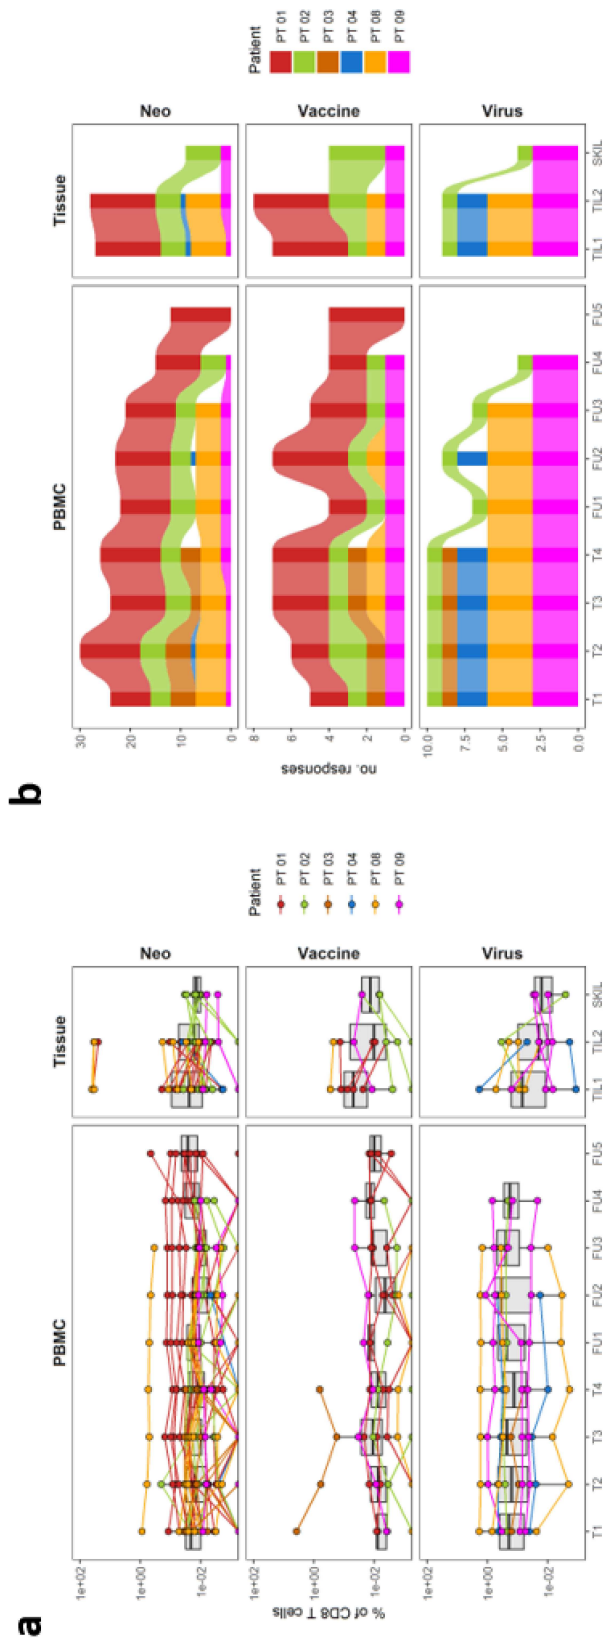

Supplement: jitc-2024-008817supp010.pdf [file jitc-2024-008817supp010.pdf]

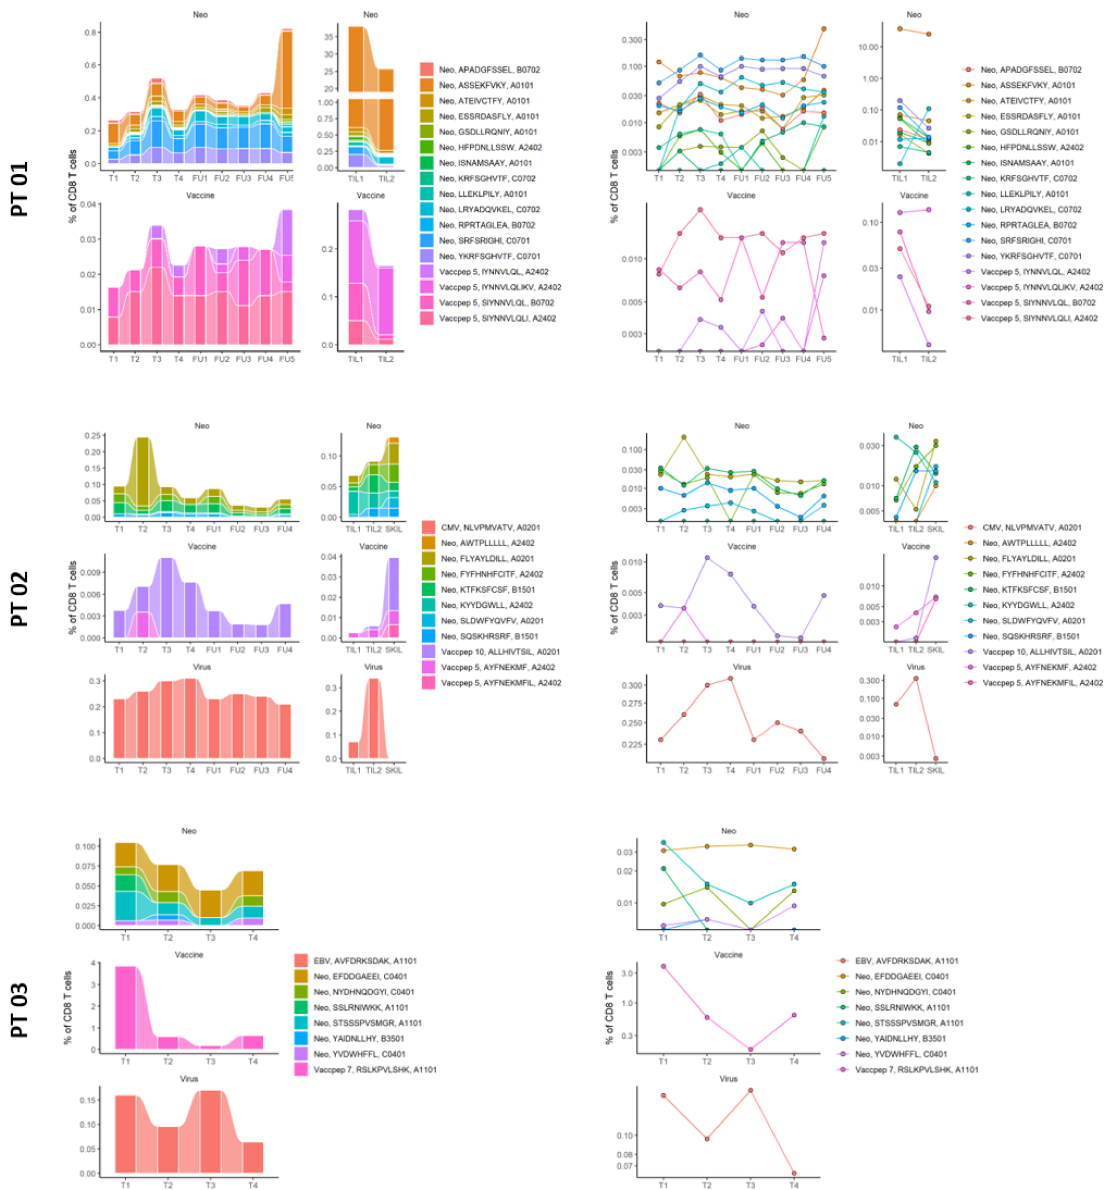

PT 04

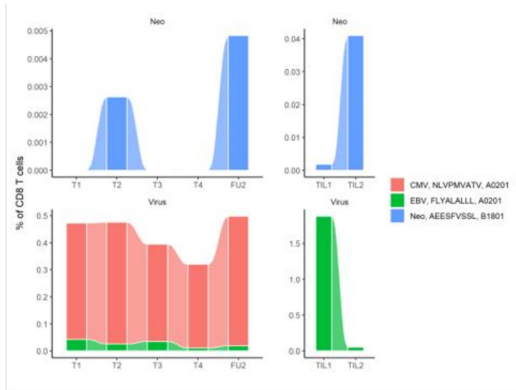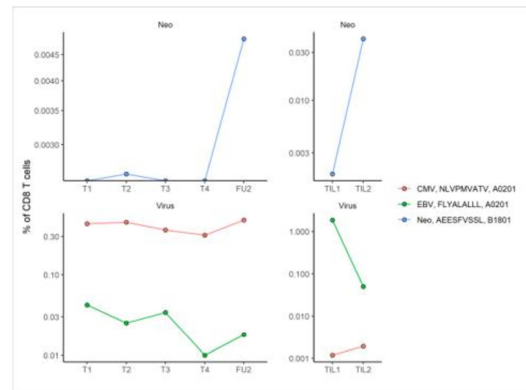

PT 08

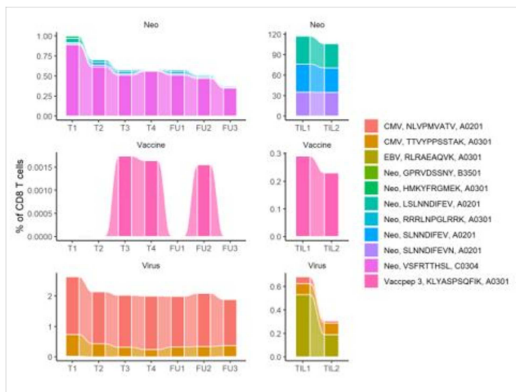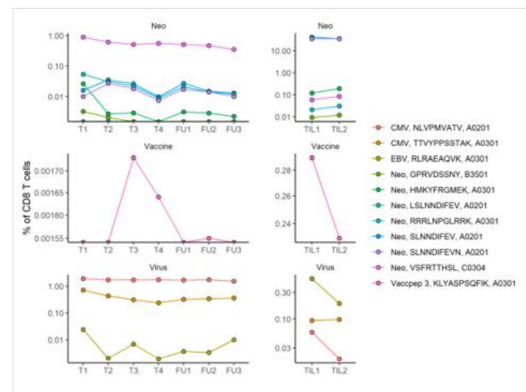

PT 09

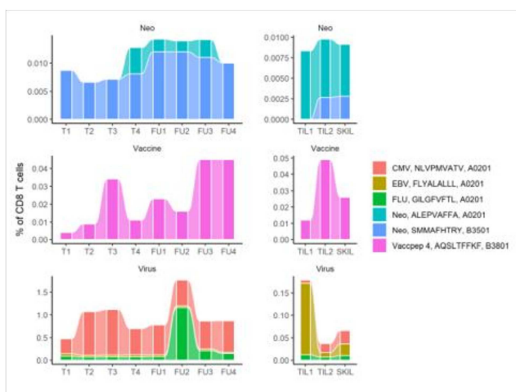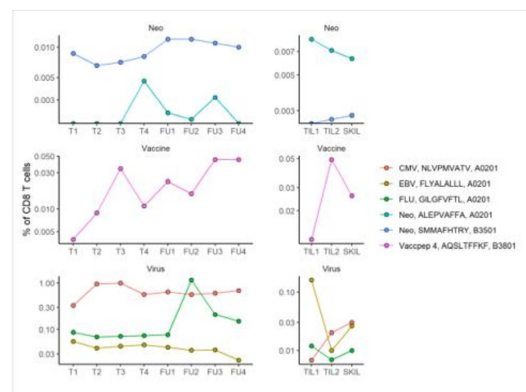

Supplement: jitc-2024-008817supp011.pdf [file jitc-2024-008817supp011.pdf]

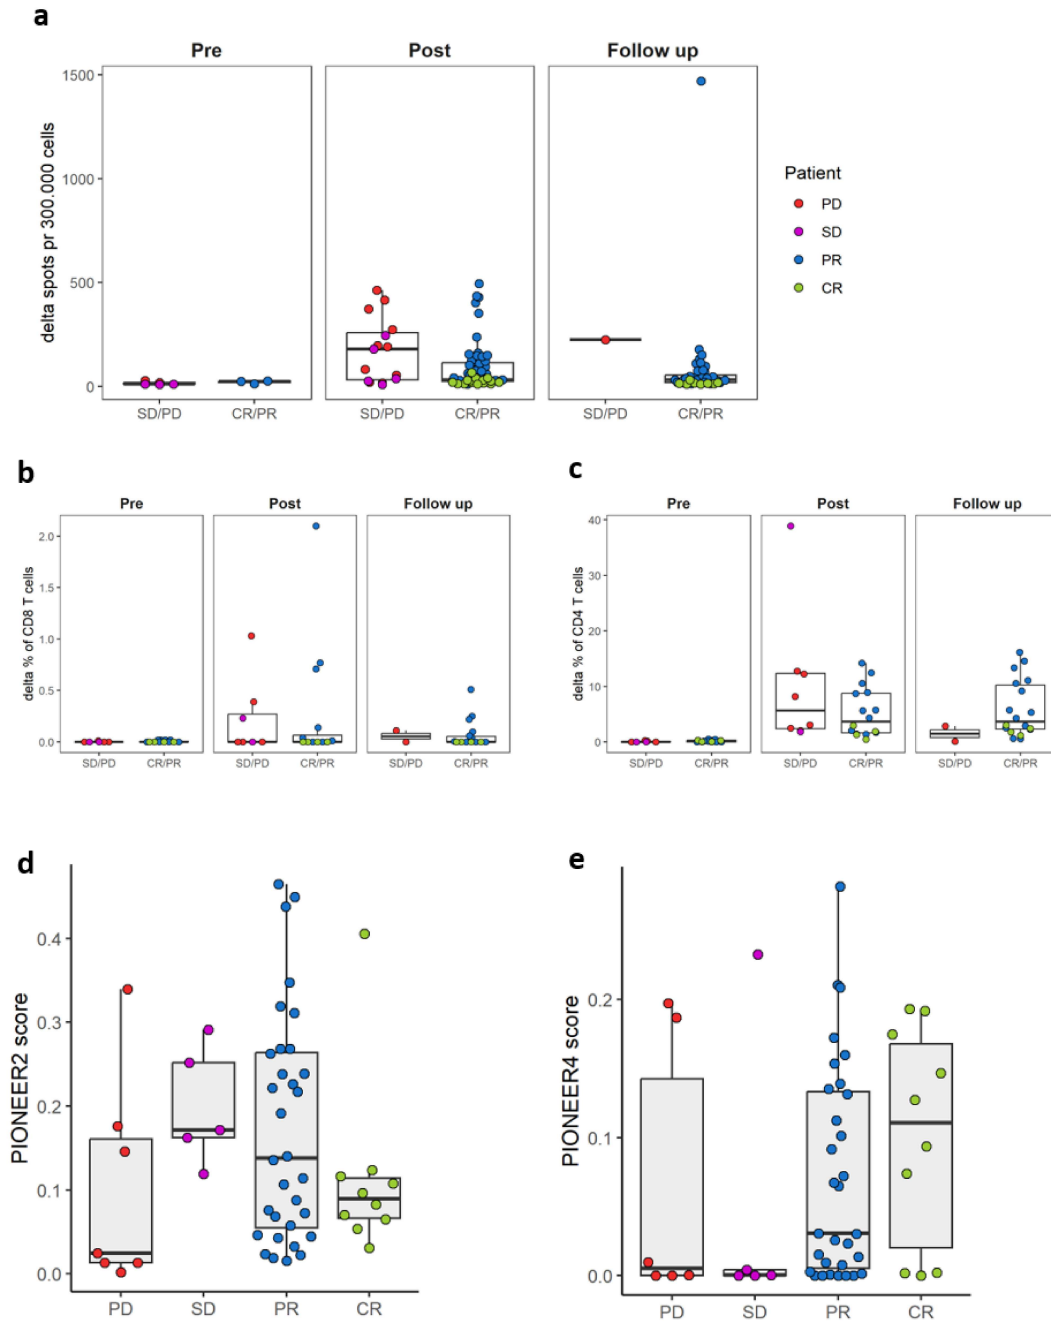

Supplement: jitc-2024-008817supp012.pdf [file jitc-2024-008817supp012.pdf]

Cohort A

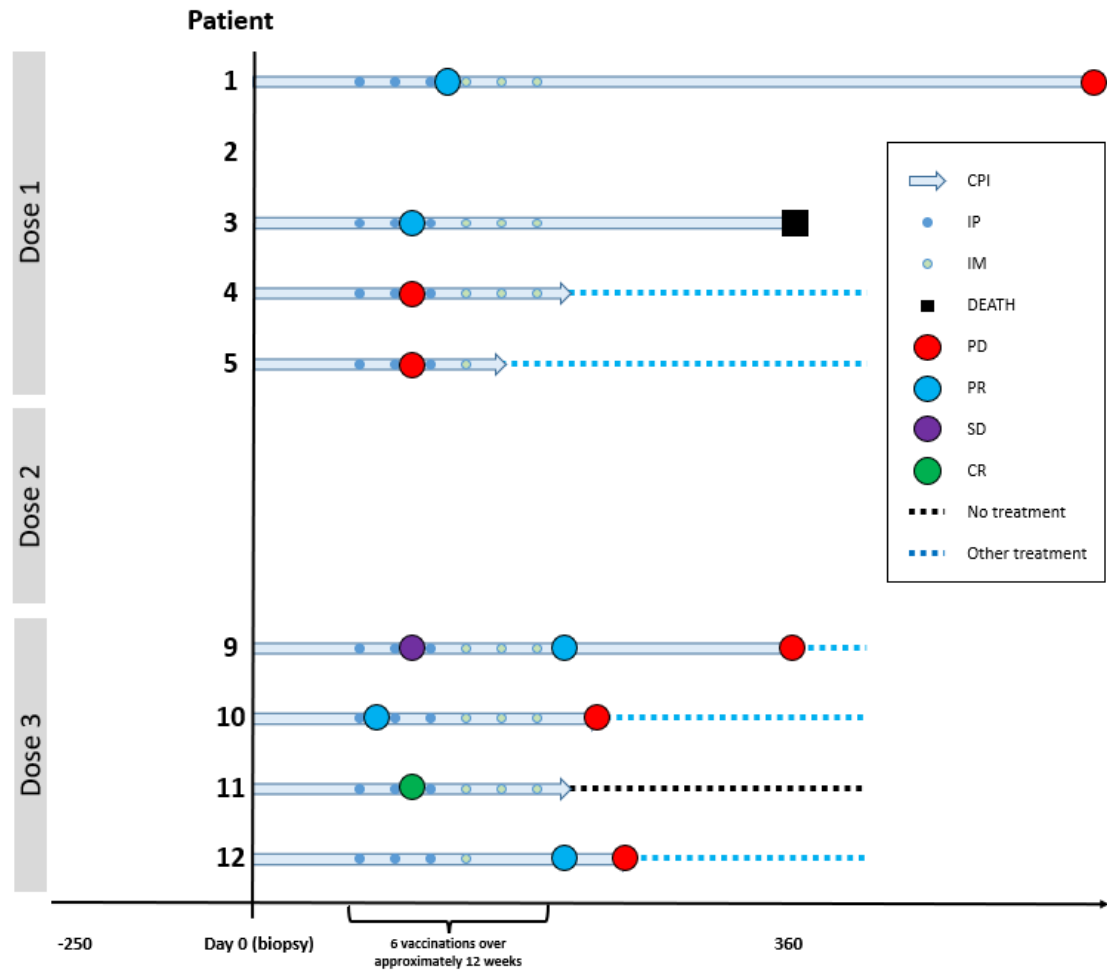

Cohort B

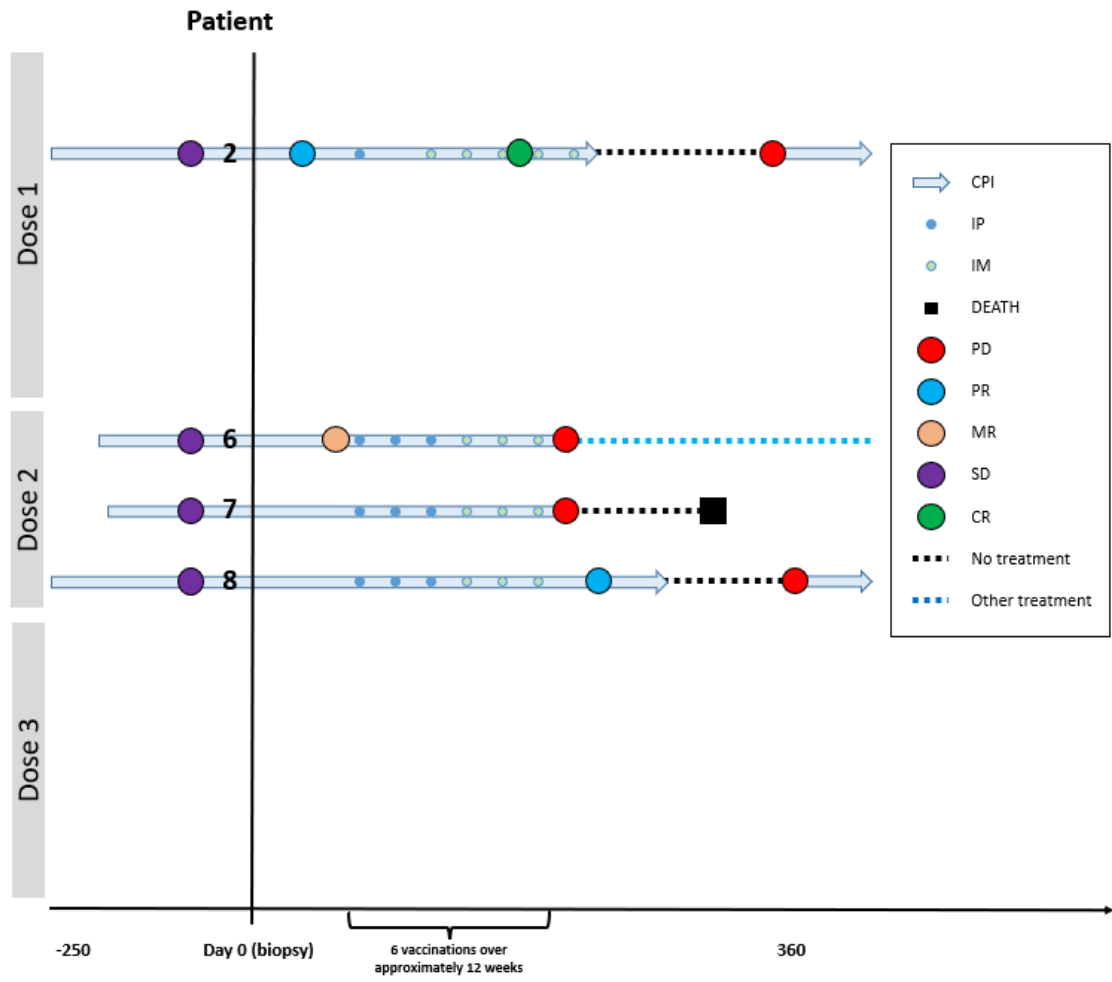

Supplement: jitc-2024-008817supp013.pdf [file jitc-2024-008817supp013.pdf]

Supplementary Table 2, Consort Table of screened and included patients.

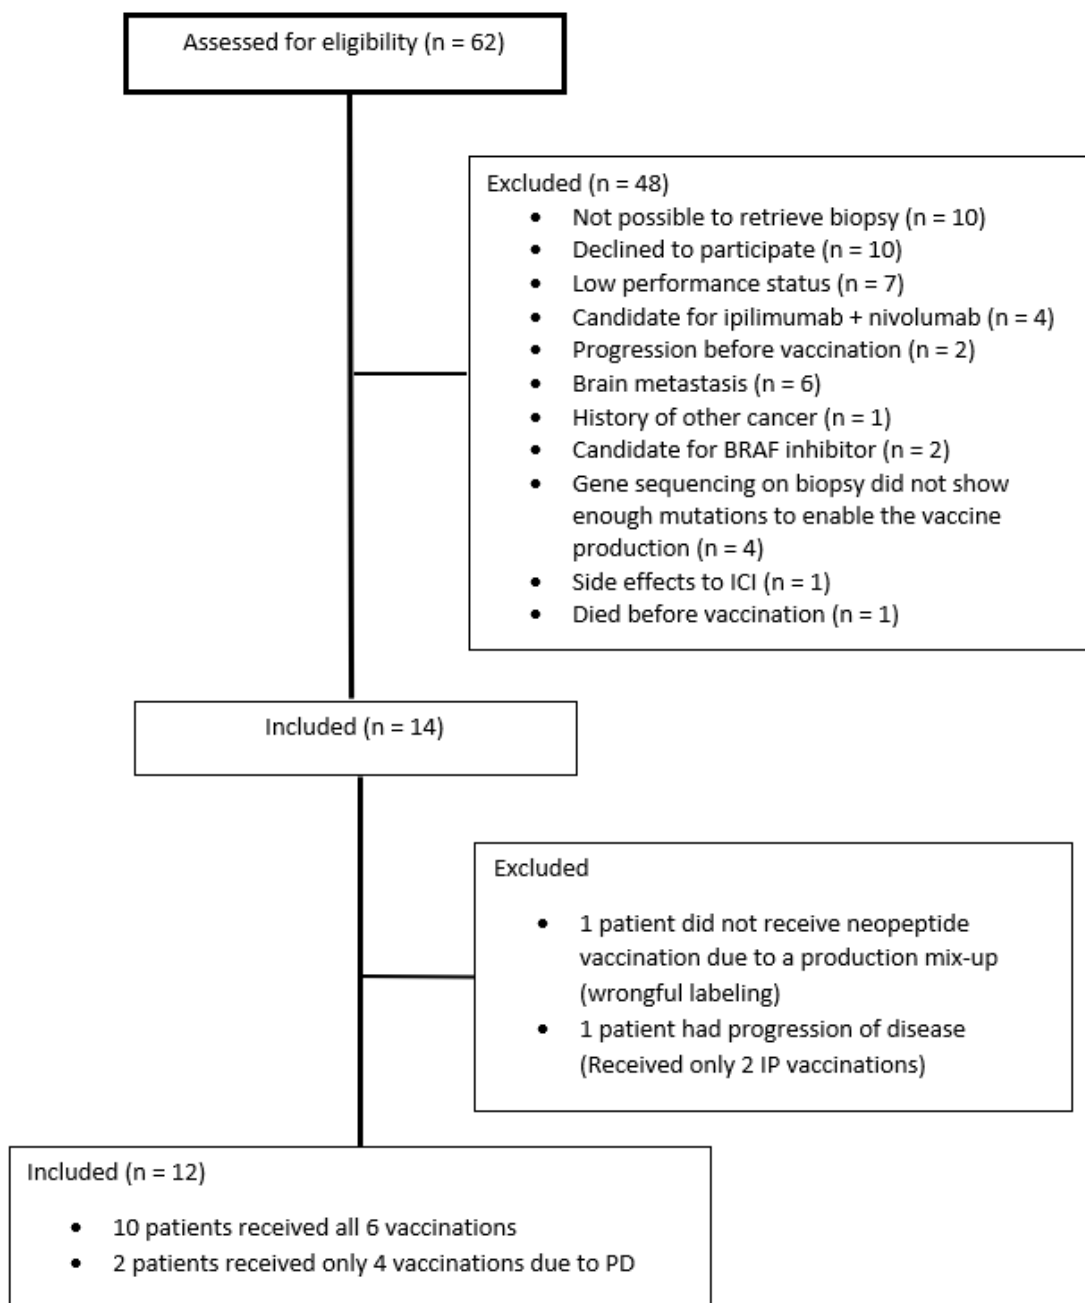

Supplement: jitc-2024-008817supp015.pdf [file jitc-2024-008817supp015.pdf]
